# Supplementary material for: Persulfate-Promoted Carbamoylation/Cyclization of Alkenes: Synthesis of Amide-Containing Quinazolinones
Source: MDPI journal article supplement (doi:10.3390/molecules29050997), 2024-02-25
Supplement: s1 [file s1]

# Supporting Information

## **Persulfate-Promoted Carbamoylation/Cyclization of Alkenes: Synthesis of Amide-containing Quinazolinones**

Jia-Jun Tang, Meng-Yang Zhao, Ying-Jun Lin, Li-Hua Yang, and Long-Yong Xie\*

*College of Chemistry and Bioengineering, Hunan University of Science and Engineering, Yongzhou  
425100, China;*

*E-mail:* xielongyong@huse.edu.cn

### **Table of Content**

|                                                                    |           |
|--------------------------------------------------------------------|-----------|
| <b>1. Radical Inhibition Experiment</b>                            | <b>S2</b> |
| <b>2. <sup>1</sup>H and <sup>13</sup>C NMR spectra of products</b> | <b>S3</b> |

## 1. Radical Inhibition Experiment

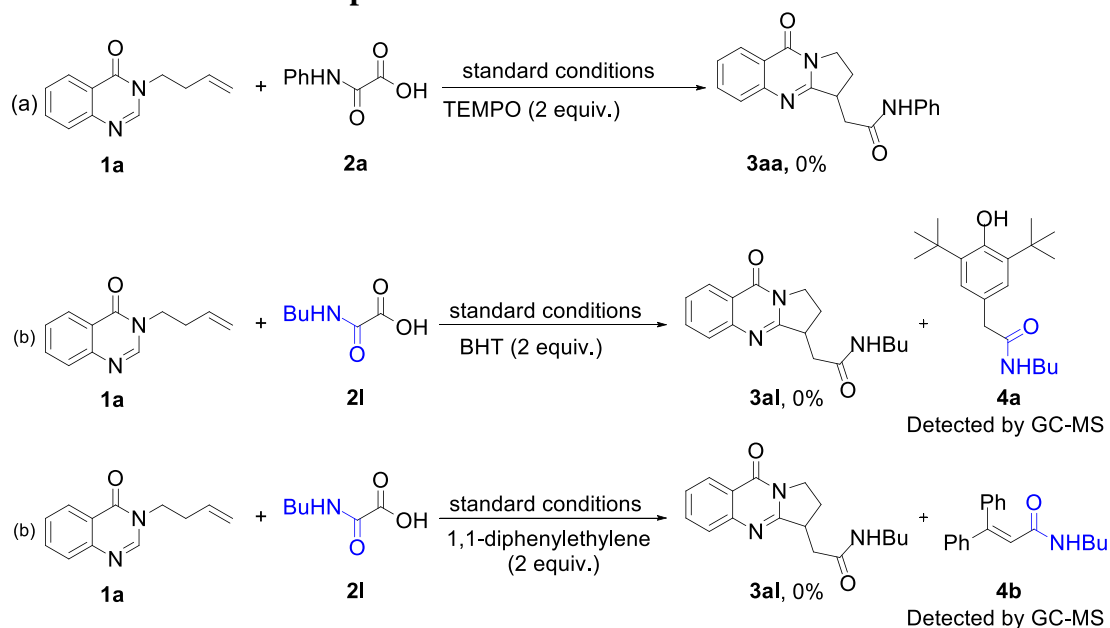

An oven-dried reaction vessel charged with a stir bar was added 3-(but-3-en-1-yl)quinazolin-4(3H)-one **1a** (0.3 mmol), 2-oxo-2-(phenylamino)acetic acid **2a** (0.6 mmol, 2 eq) and  $(\text{NH}_4)_2\text{S}_2\text{O}_8$  (1.05 mmol, 3.5 eq) and 2 eq. of radical inhibitor (TEMPO, BHT or 1,1-diphenylethylene) in DMSO- $\text{H}_2\text{O}$  solvent (3 mL, v/v 100:1). The reaction mixture was stirred at 100 °C under  $\text{N}_2$  atmosphere for about 6 h, no desired product **3aa** and **3al** were obtained, and the radical adduct **4a** and **4b** were detected by GC-MS (for compound **4a**, MS:  $\text{M}^+$  calcd for  $\text{C}_{20}\text{H}_{33}\text{NO}_2$  319.25., found 319.20). The MS spectra of compound **4a** are as following (Figure S1).

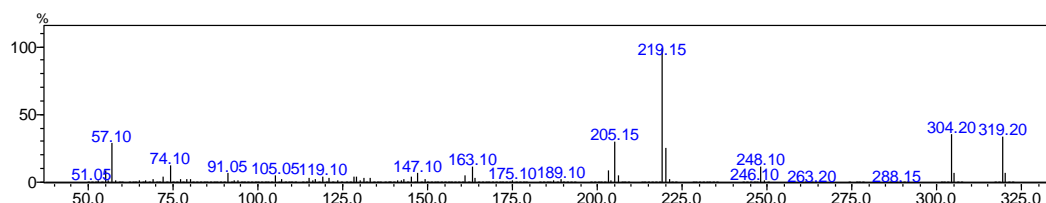

**Figure S1.** MS spectra of compound **4a**

For compound **4b**, MS:  $\text{M}^+$  calcd for  $\text{C}_{19}\text{H}_{21}\text{NO}_2$  279.16, found 279.10, The MS spectra of compound **4b** are as following (Figure S2).

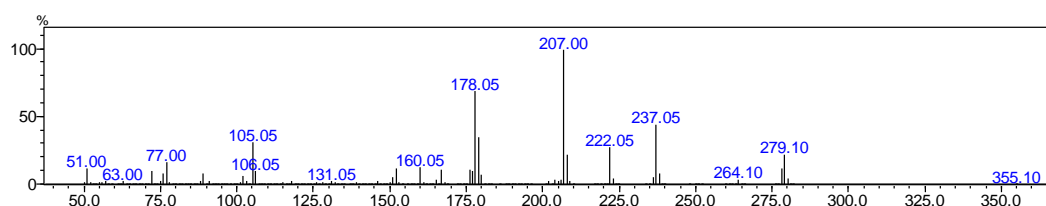

**Figure S2.** MS spectra of compound **4b**

## 2. $^1\text{H}$ and $^{13}\text{C}$ NMR spectra of products

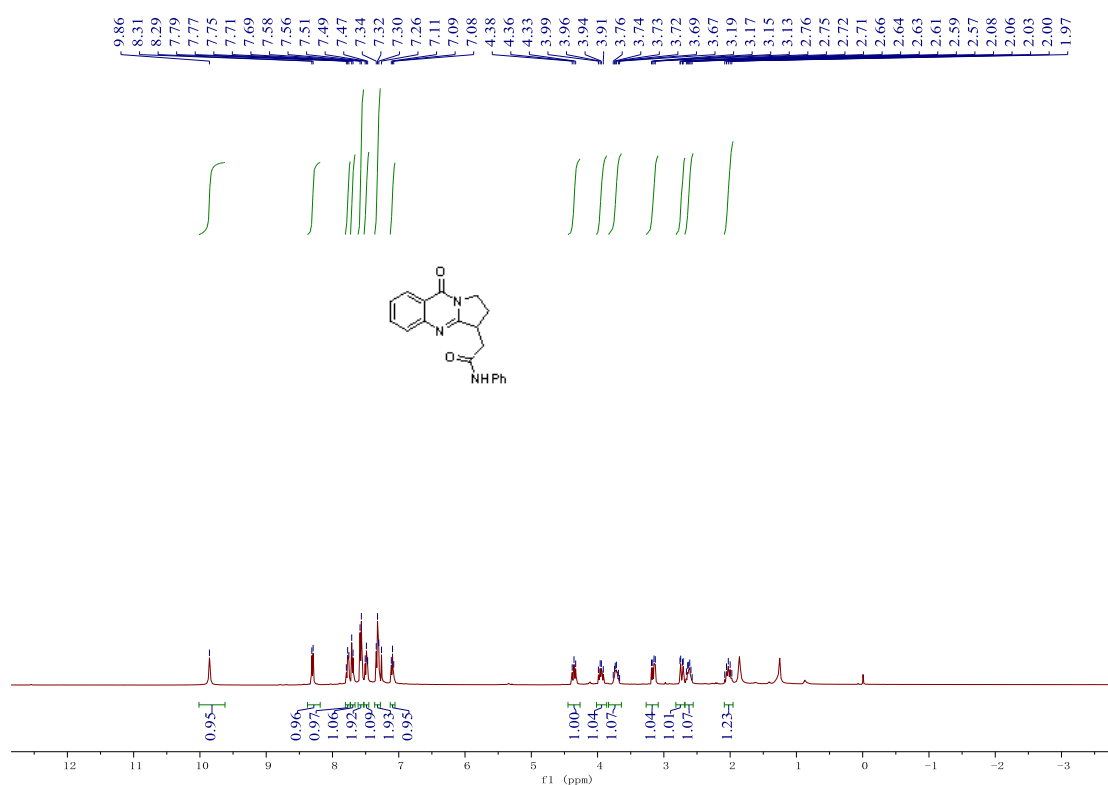

Figure S3  $^1\text{H}$  NMR spectra of 3aa

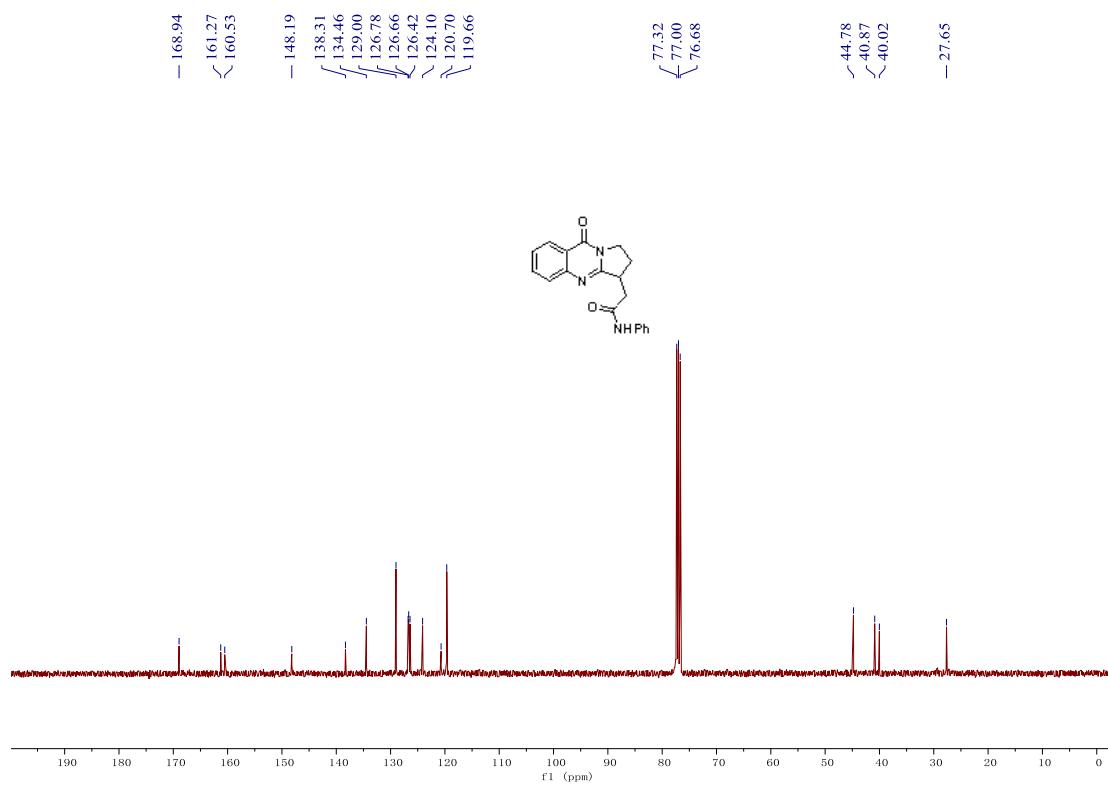

Figure S4  $^{13}\text{C}$  NMR spectra of 3aa

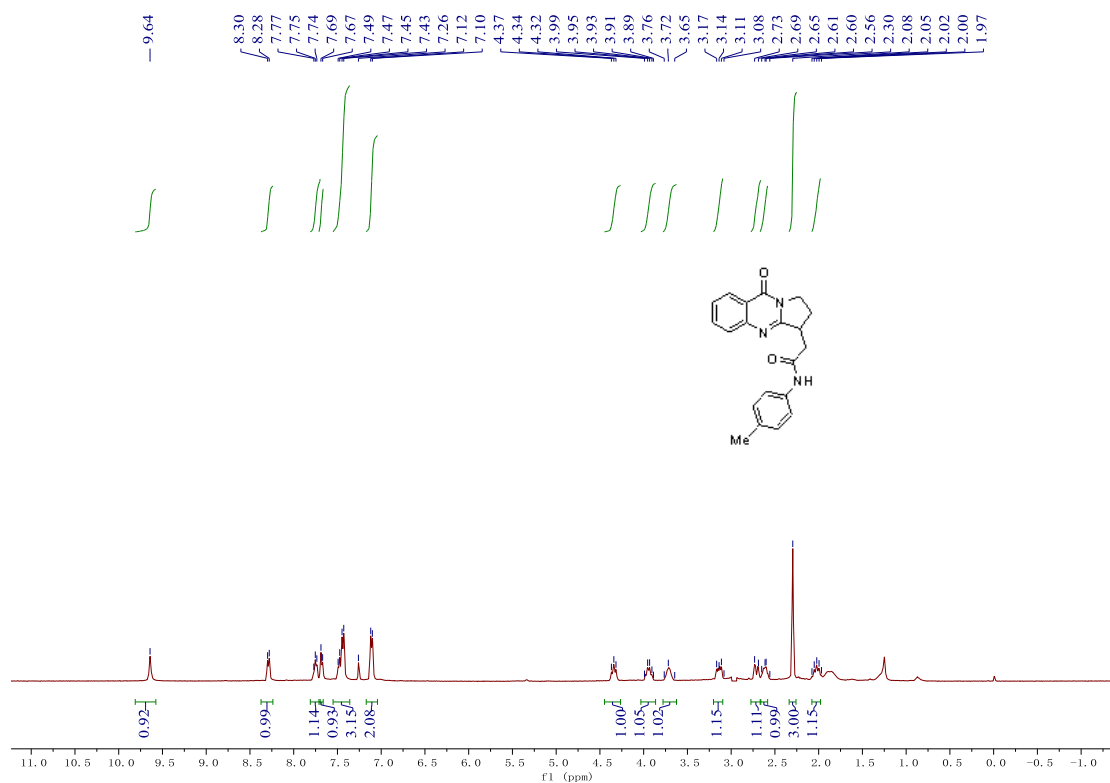

**Figure S5 <sup>1</sup>H NMR spectra of 3ab**

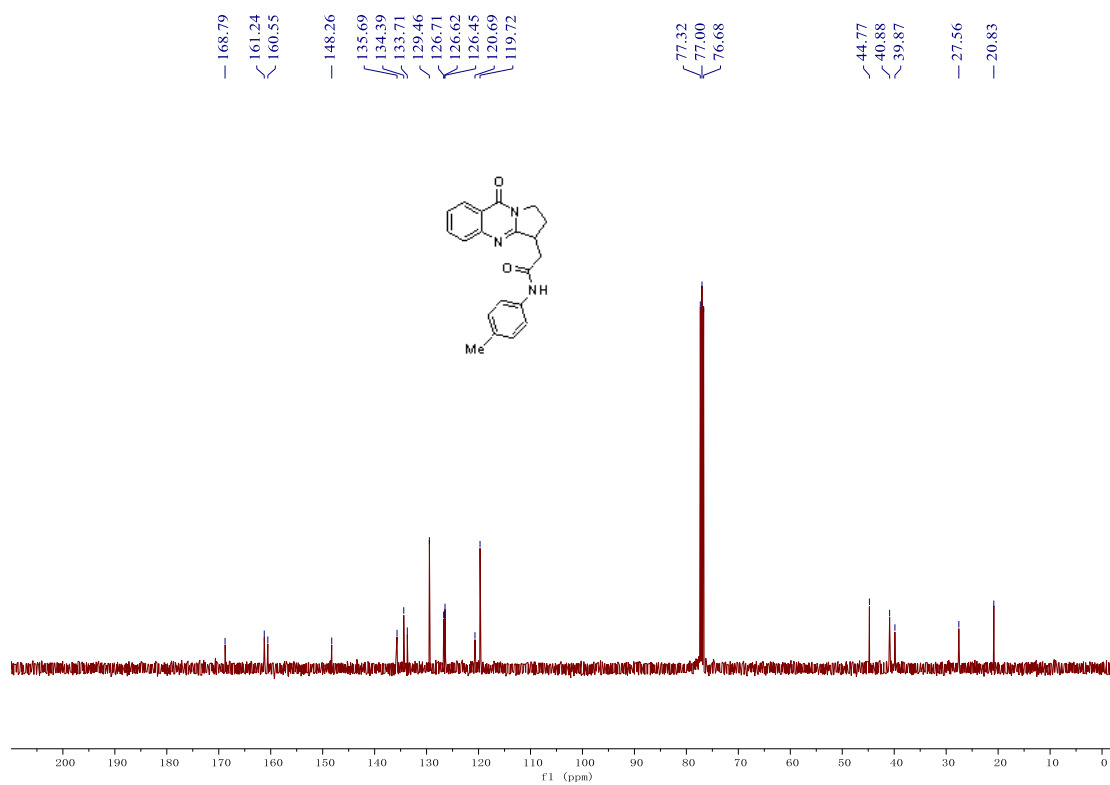

**Figure S6 <sup>13</sup>C NMR spectra of 3ab**

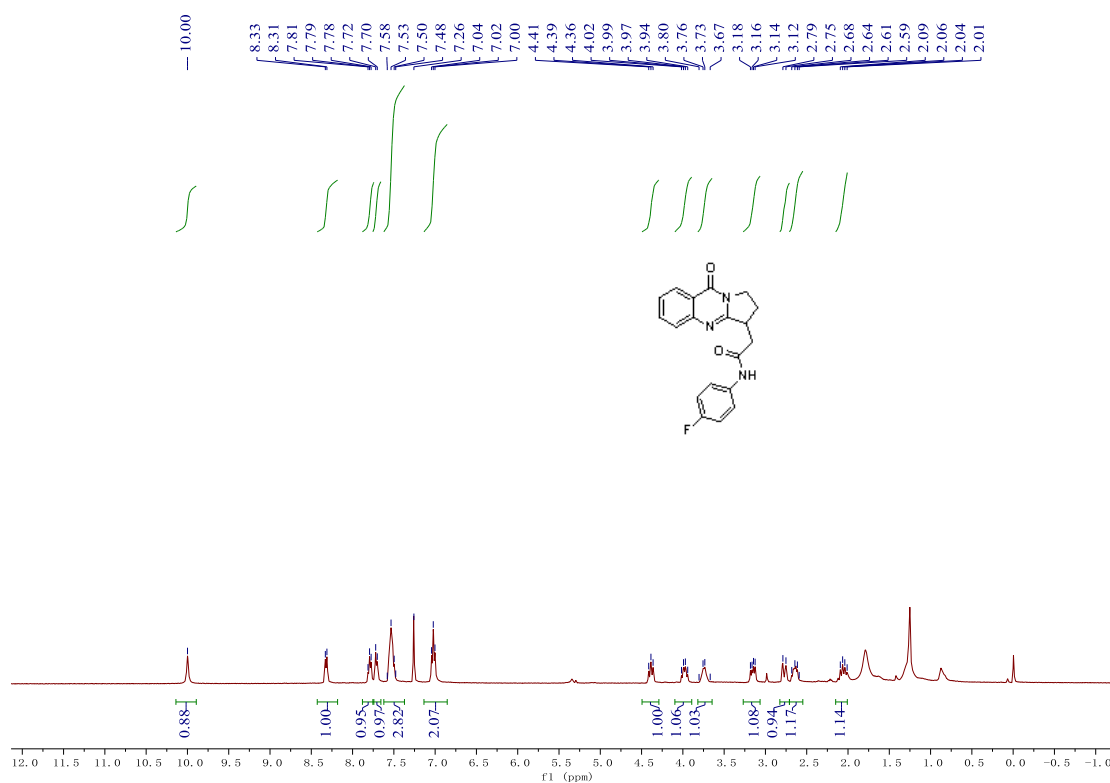

**Figure S7** <sup>1</sup>H NMR spectra of **3ac**

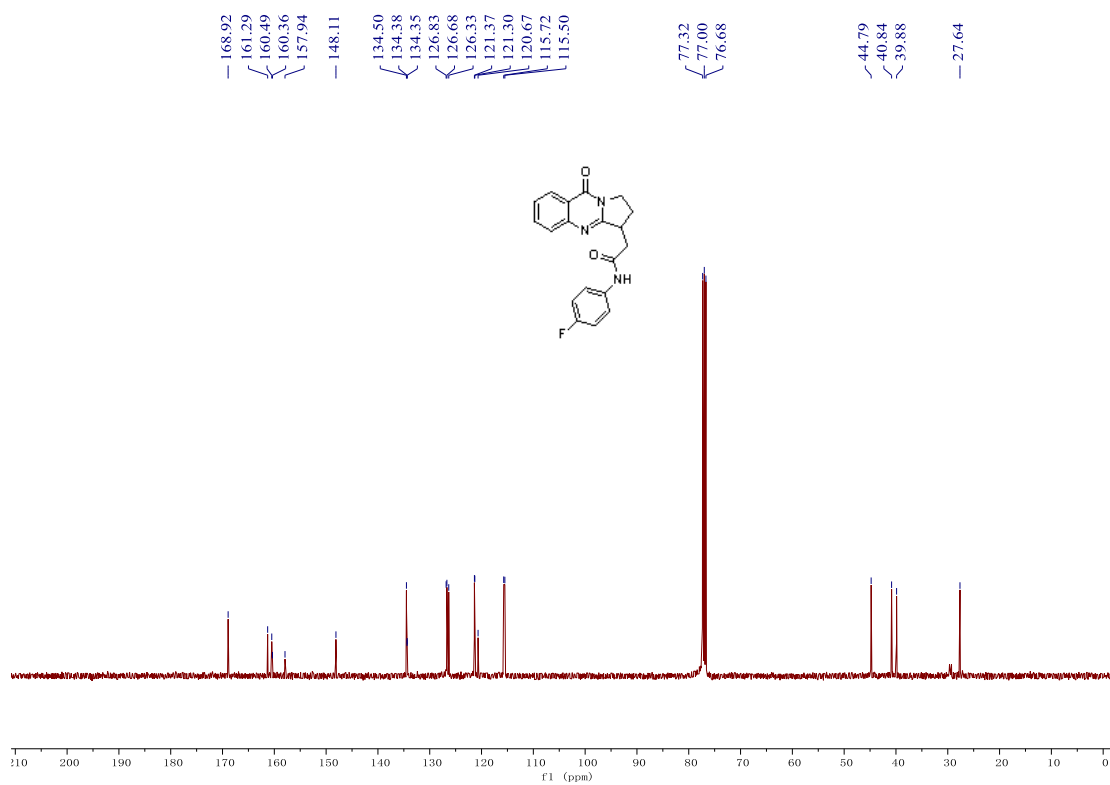

**Figure S8** <sup>13</sup>C NMR spectra of **3ac**

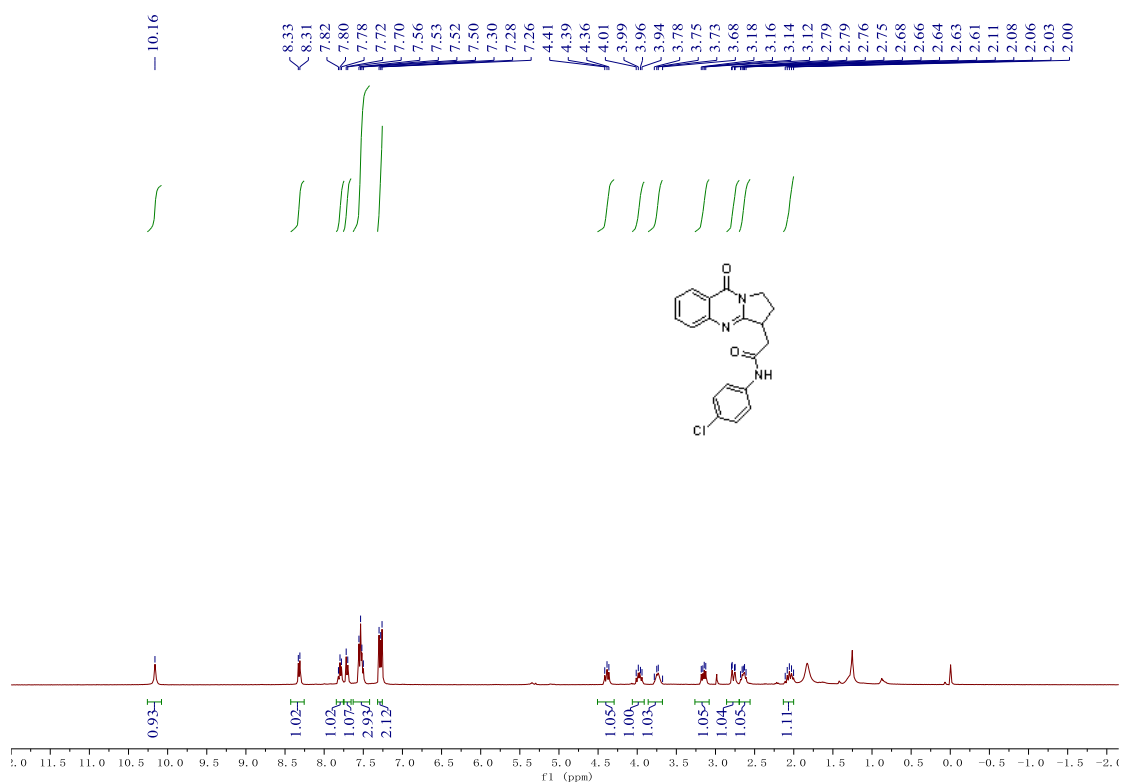

**Figure S9** <sup>1</sup>H NMR spectra of **3ad**

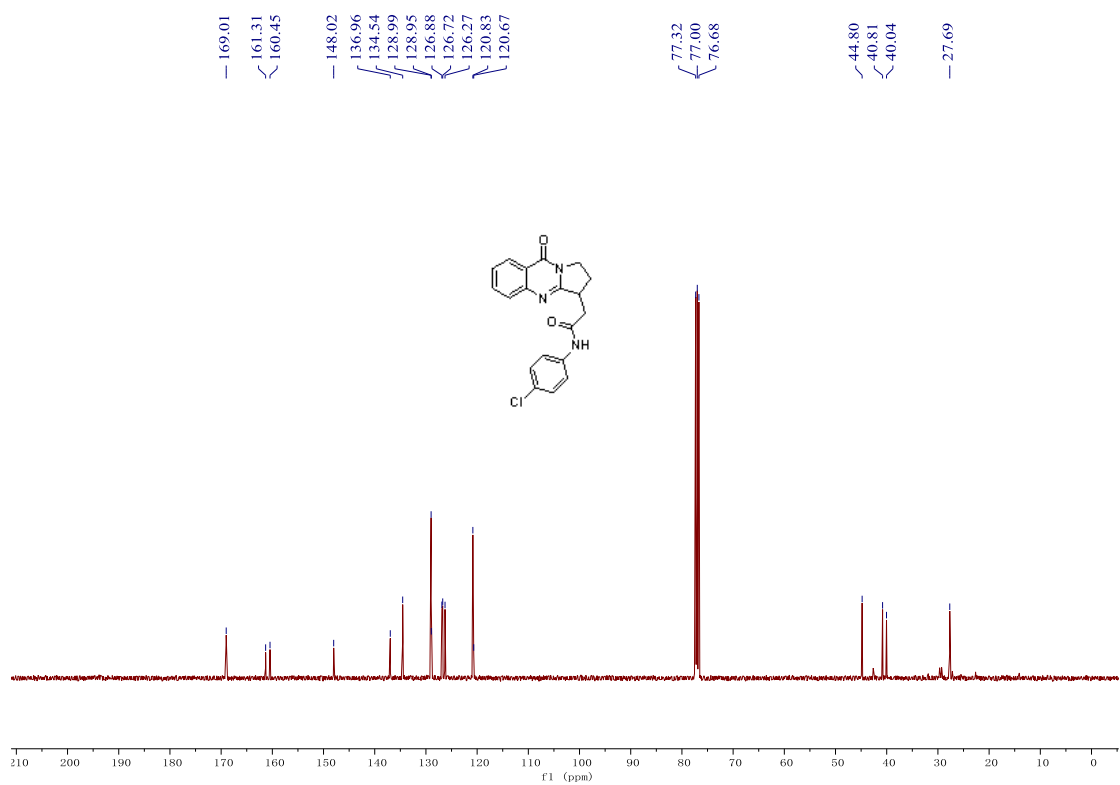

**Figure S10** <sup>13</sup>C NMR spectra of **3ad**

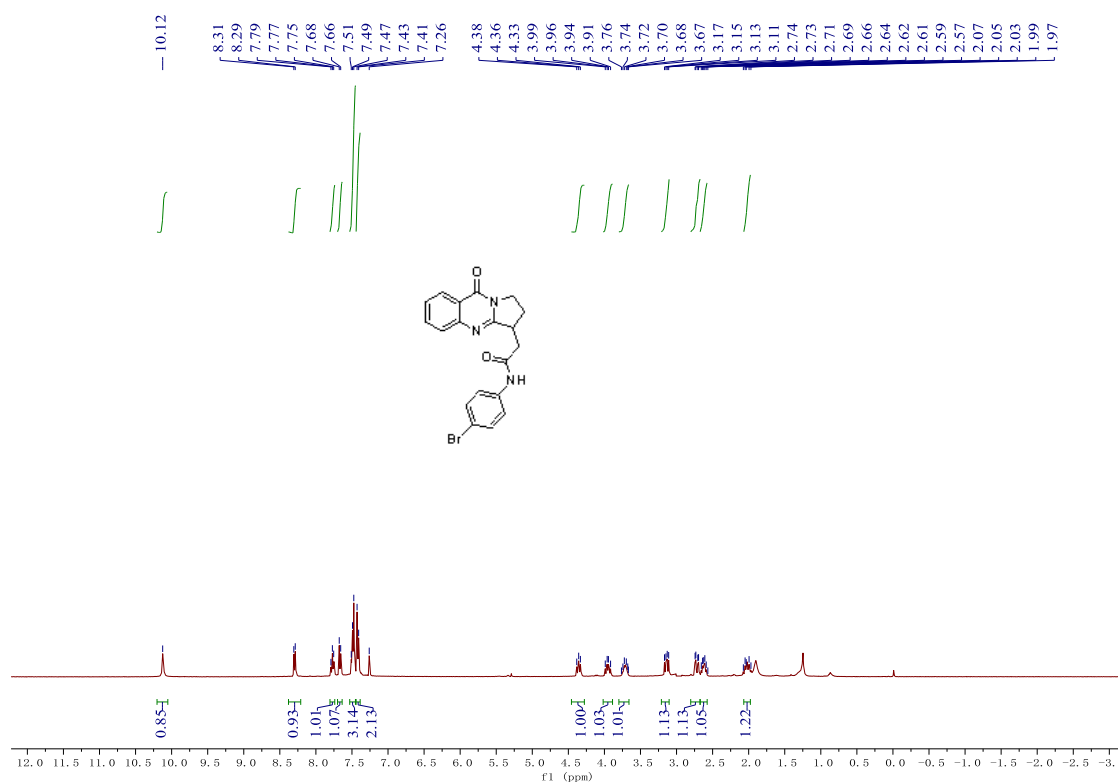

**Figure S11** <sup>1</sup>H NMR spectra of **3ae**

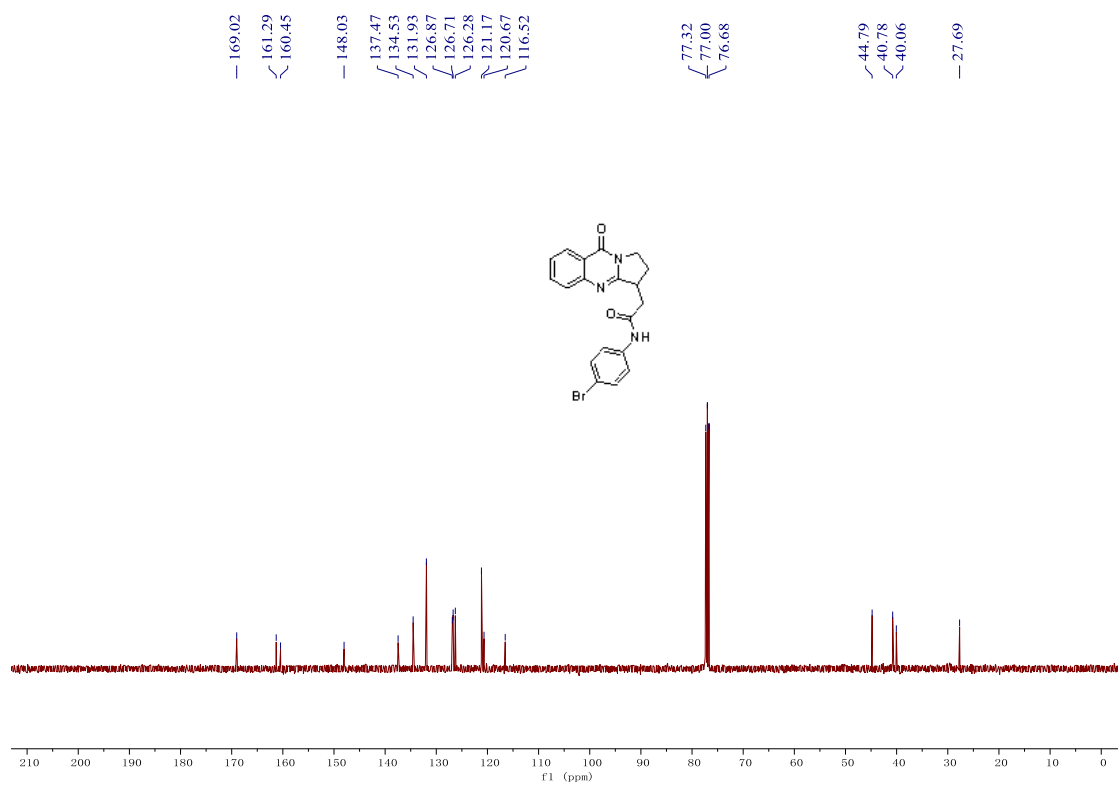

**Figure S12** <sup>13</sup>C NMR spectra of **3ae**

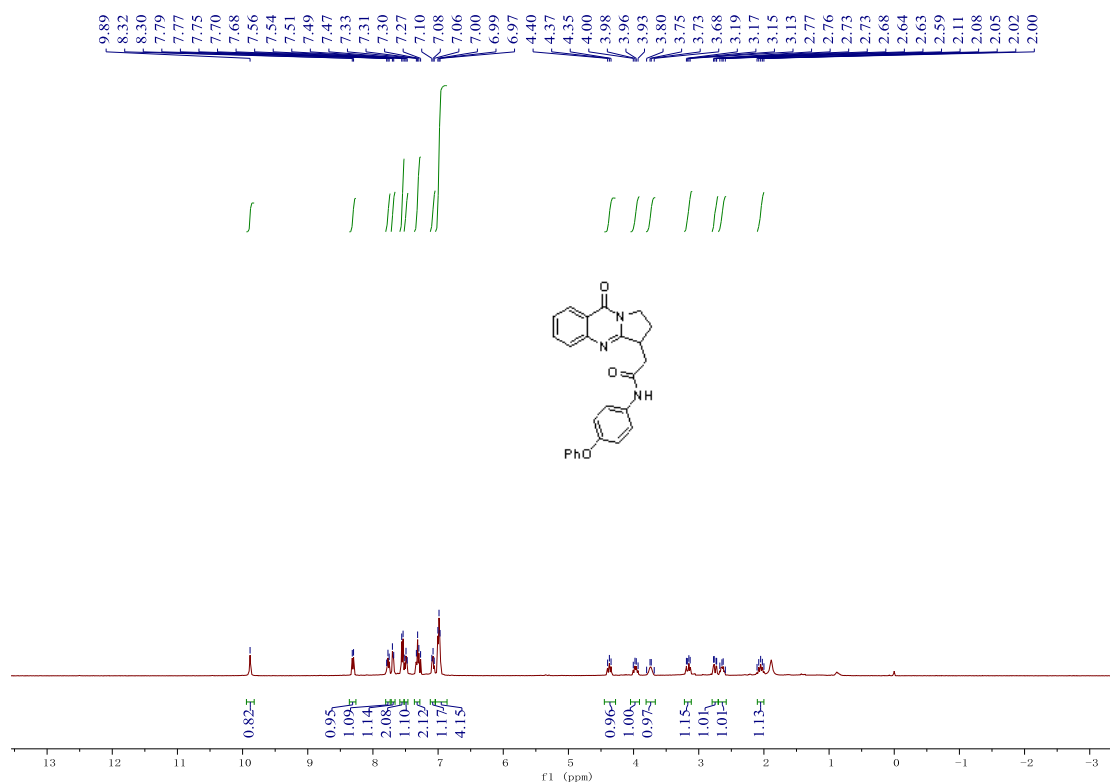

Figure S13 <sup>1</sup>H NMR spectra of **3af**

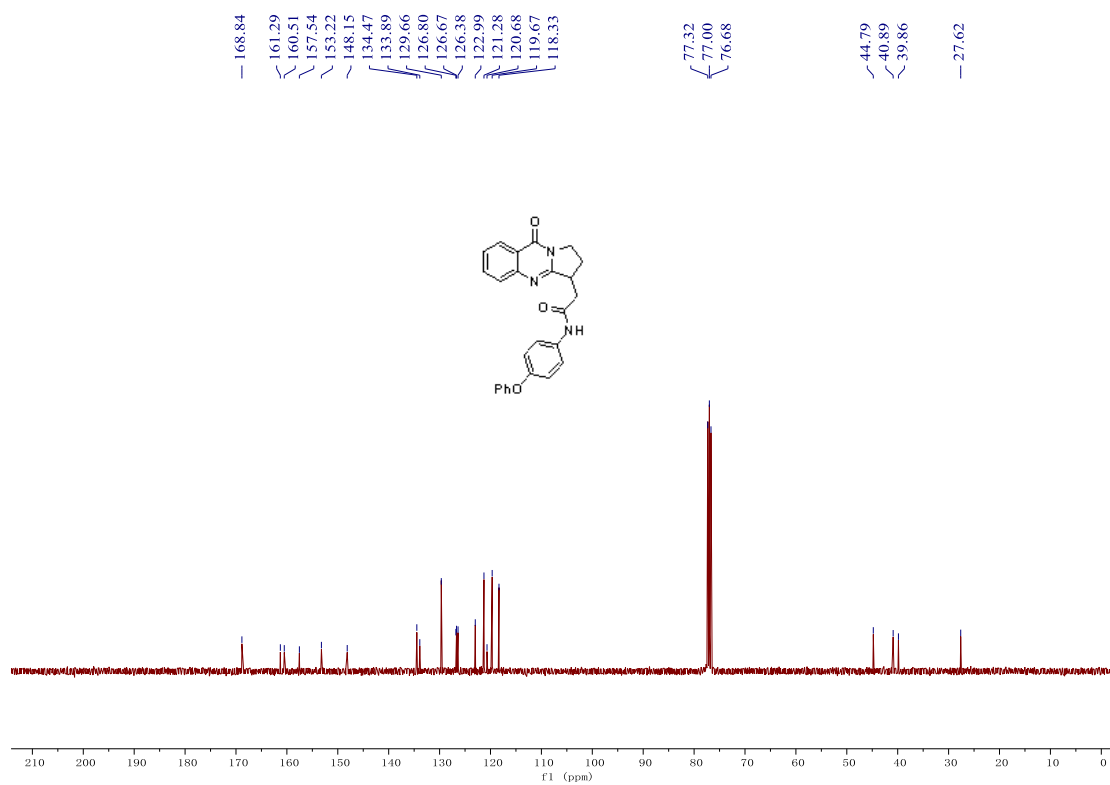

Figure S14 <sup>13</sup>C NMR spectra of **3af**

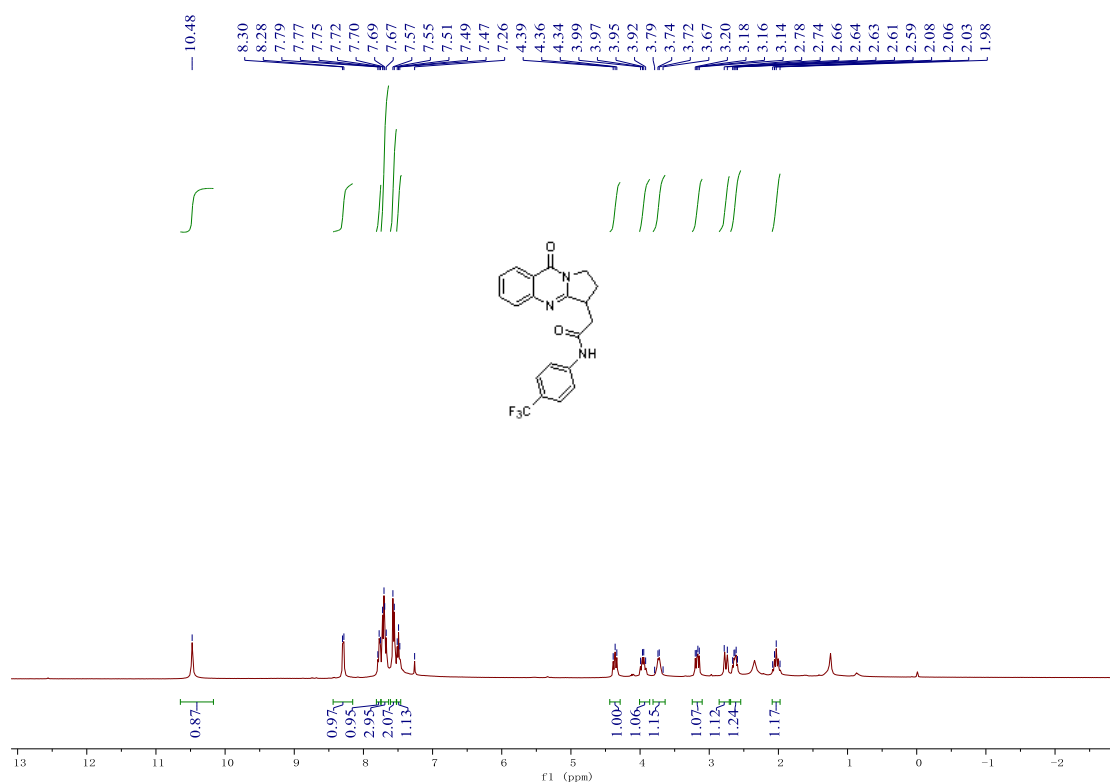

Figure S15 <sup>1</sup>H NMR spectra of **3ag**

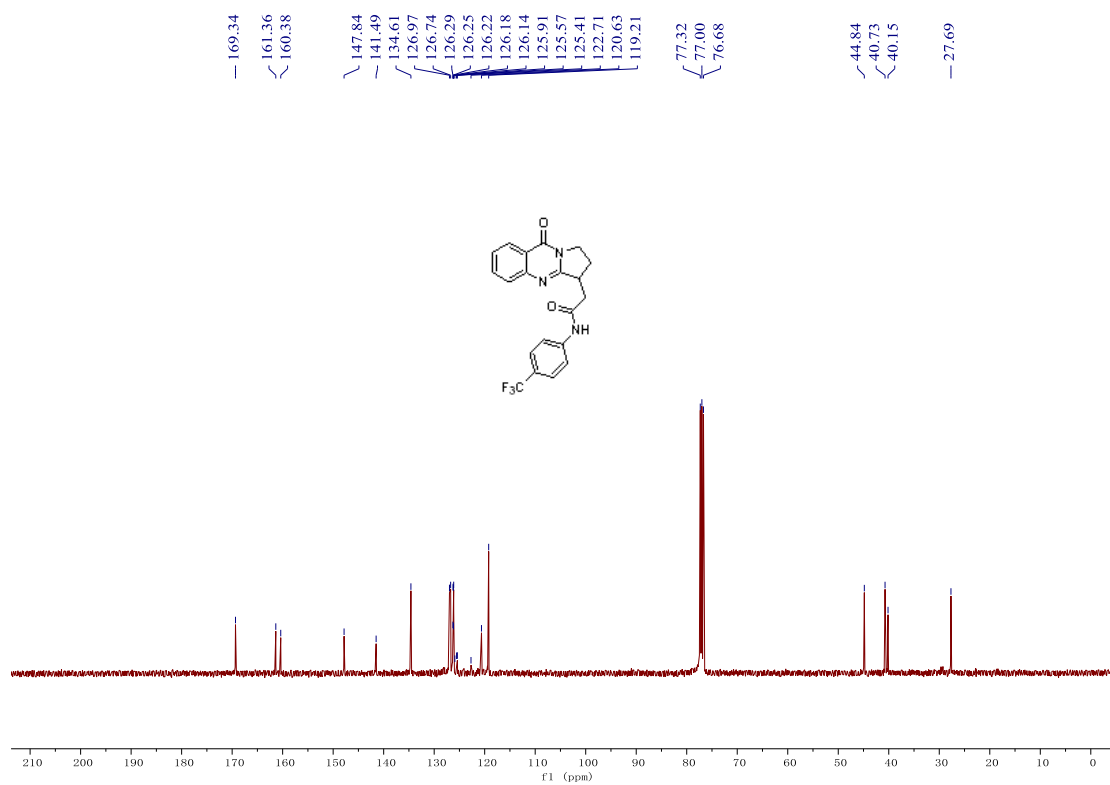

Figure S16 <sup>13</sup>C NMR spectra of **3ag**

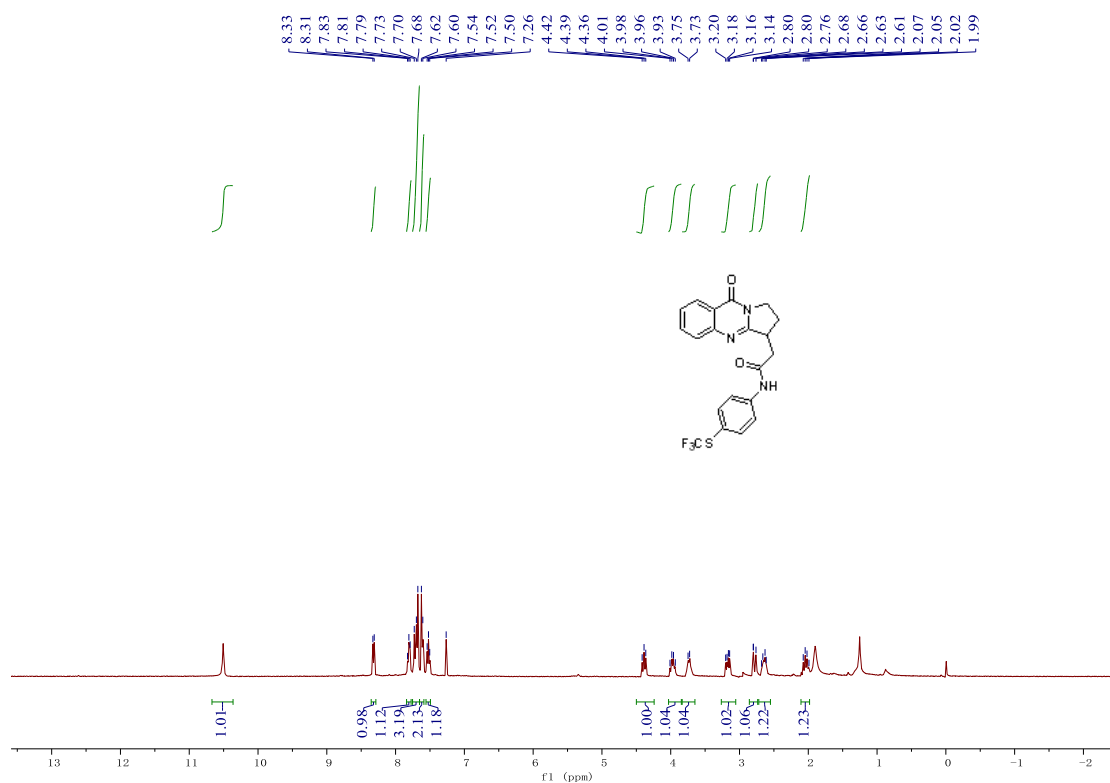

**Figure S17** <sup>1</sup>H NMR spectra of **3ah**

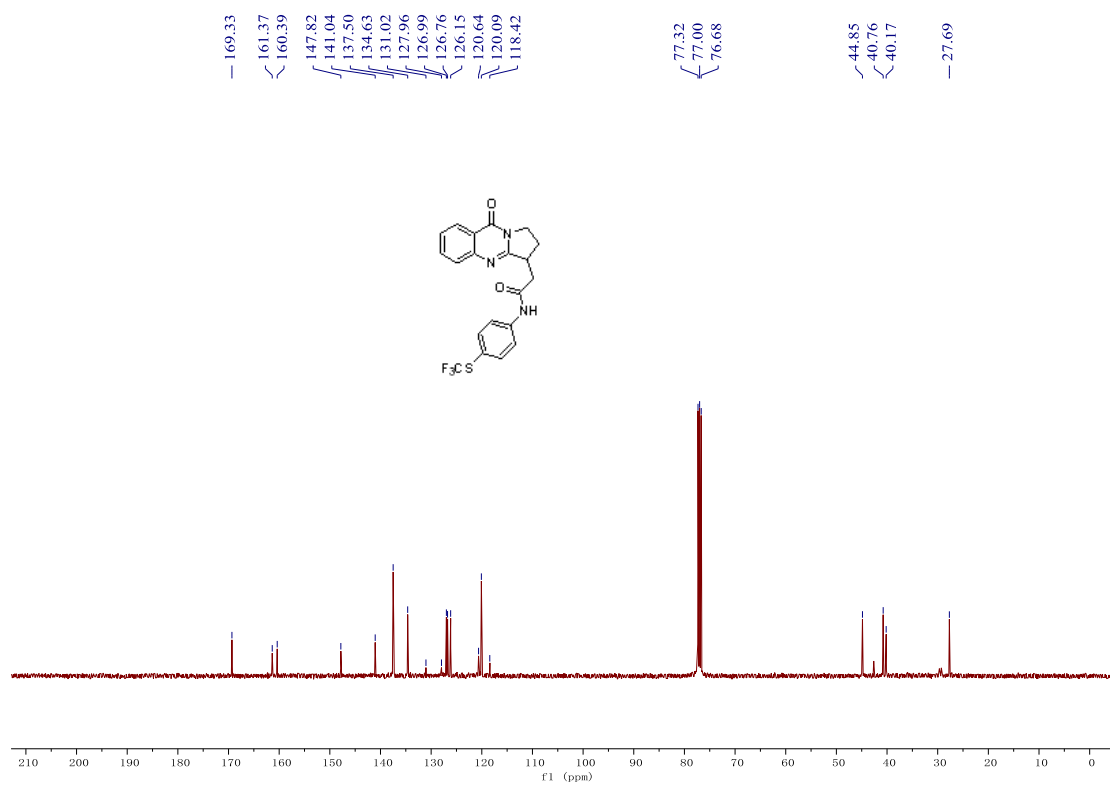

**Figure S18** <sup>13</sup>C NMR spectra of **3ah**

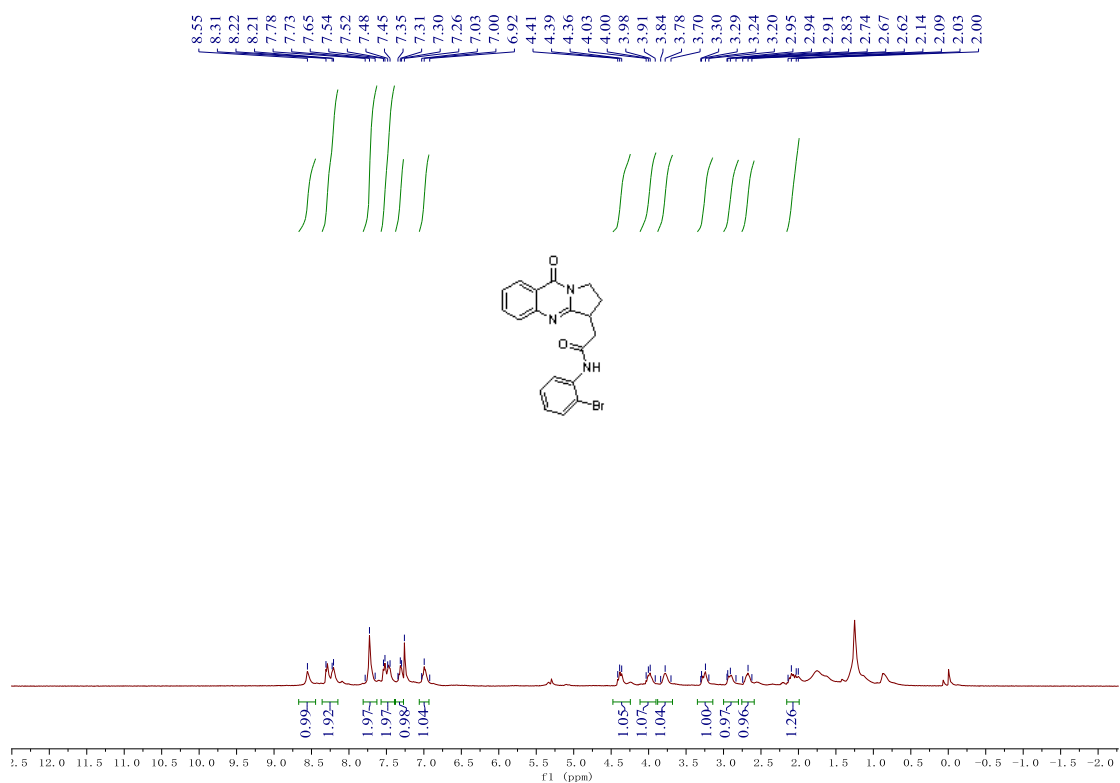

Figure S19 <sup>1</sup>H NMR spectra of **3ai**

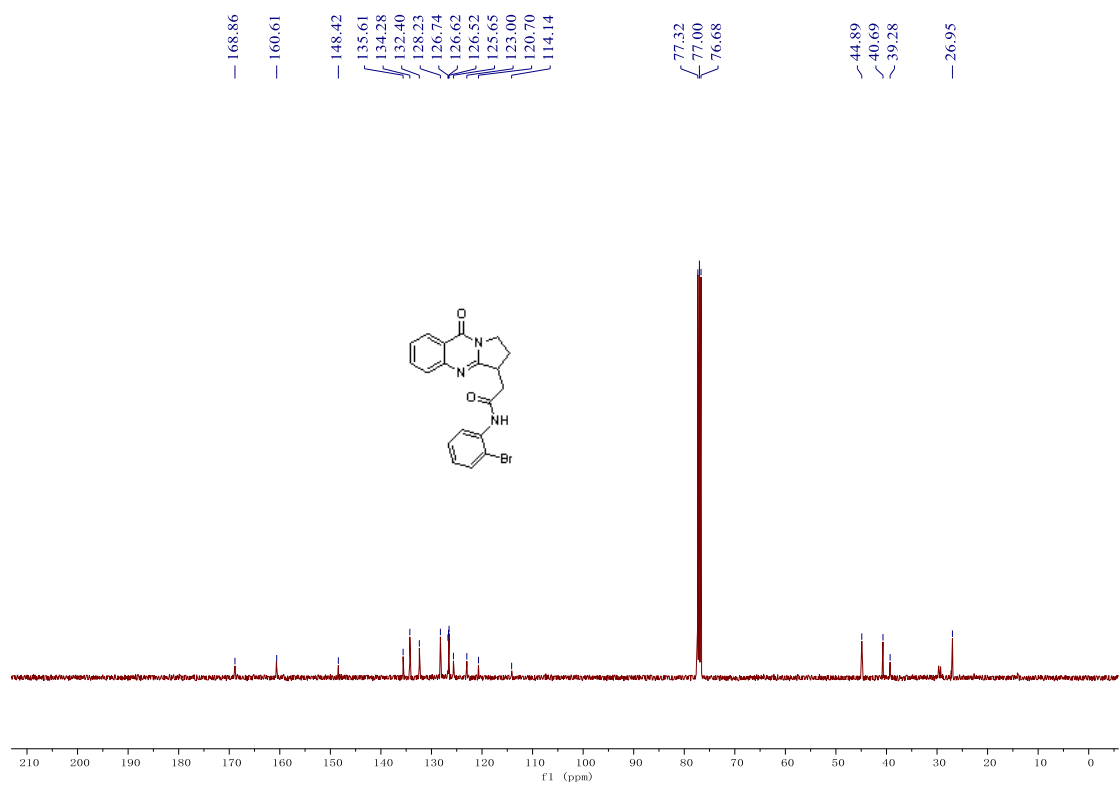

Figure S20 <sup>13</sup>C NMR spectra of **3ai**

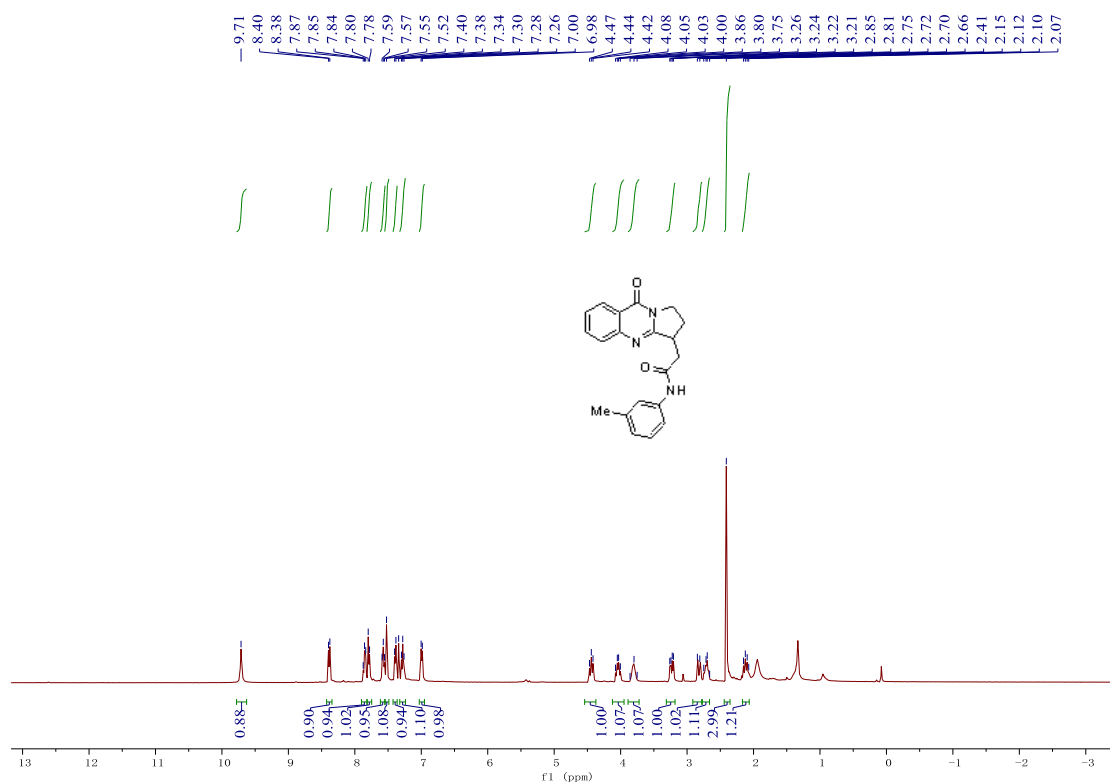

Figure S21 <sup>1</sup>H NMR spectra of **3aj**

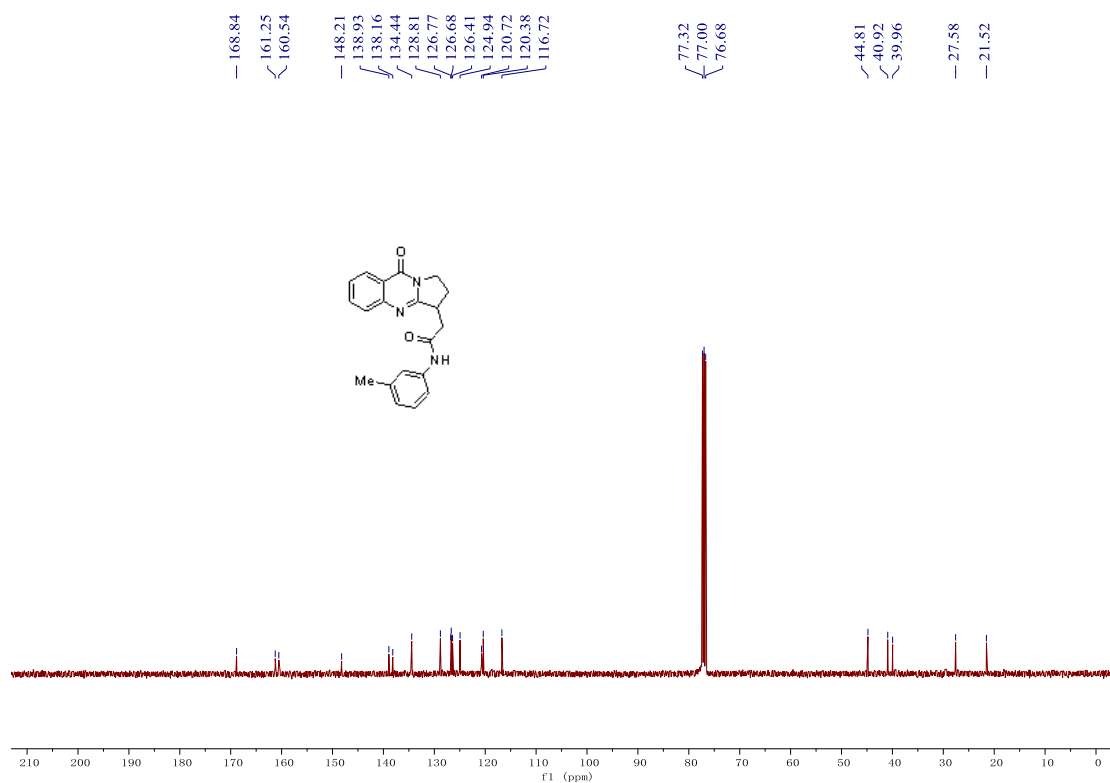

Figure S22 <sup>13</sup>C NMR spectra of **3aj**

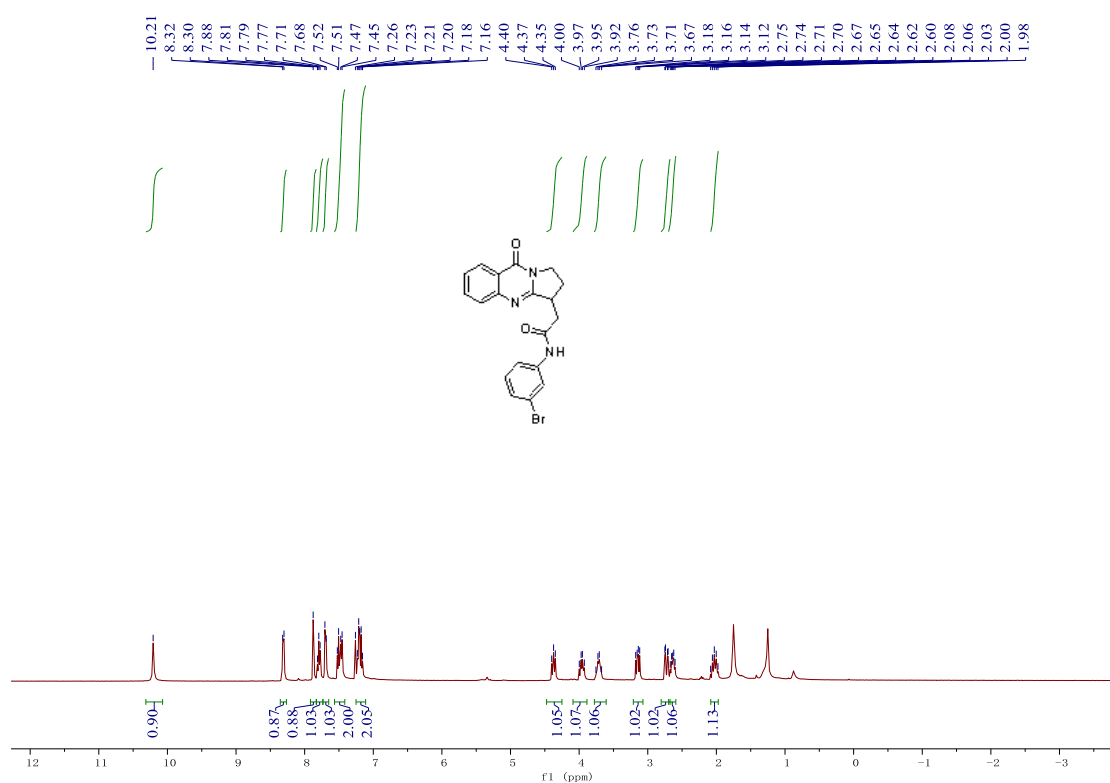

Figure S23 <sup>1</sup>H NMR spectra of 3ak

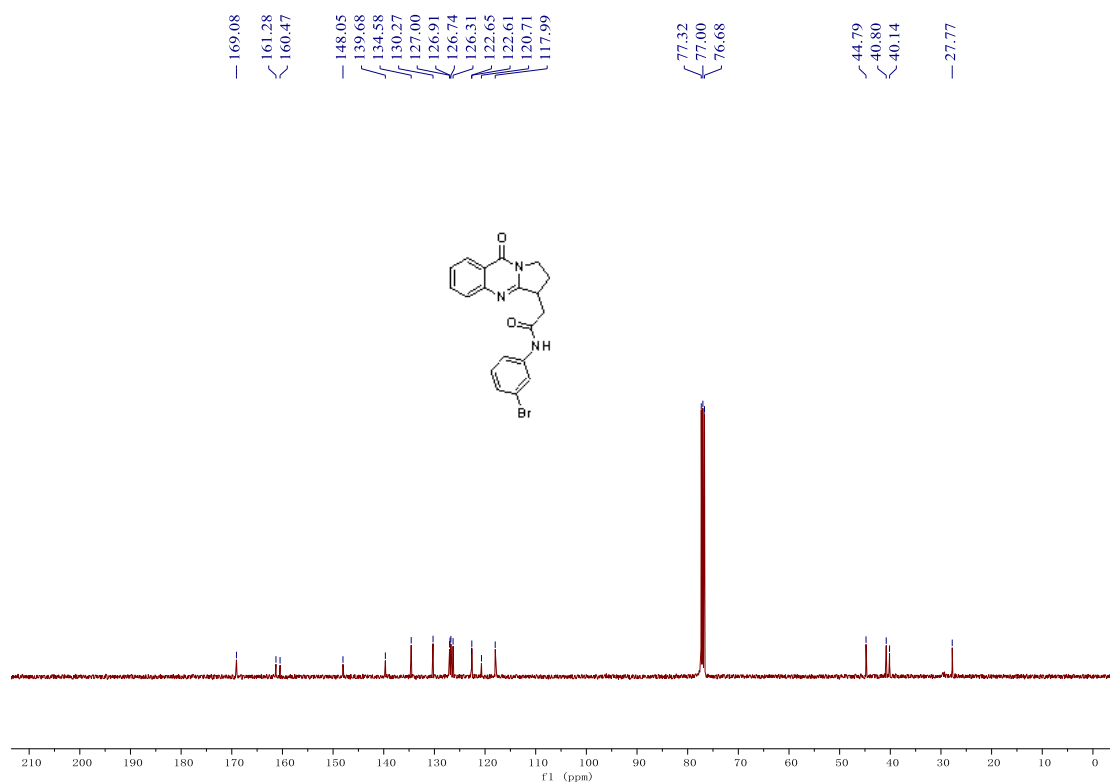

Figure S24 <sup>13</sup>C NMR spectra of 3ak

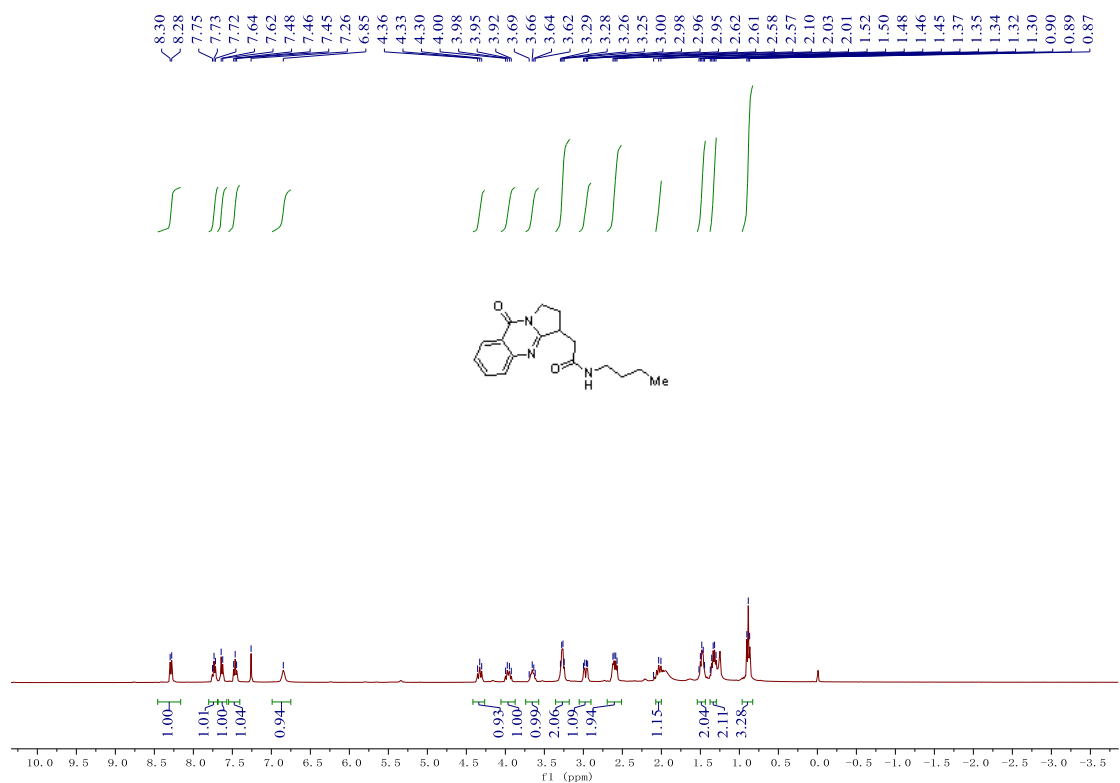

**Figure S25** <sup>1</sup>H NMR spectra of **3al**

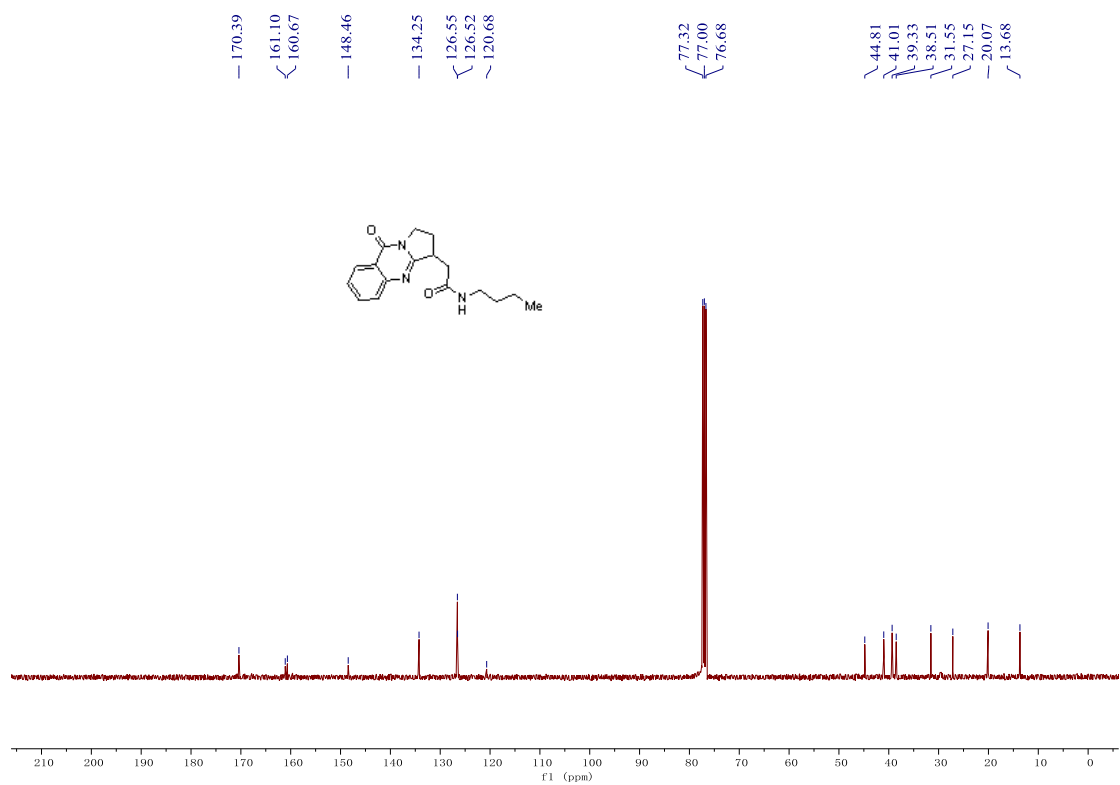

**Figure S26** <sup>13</sup>C NMR spectra of **3al**

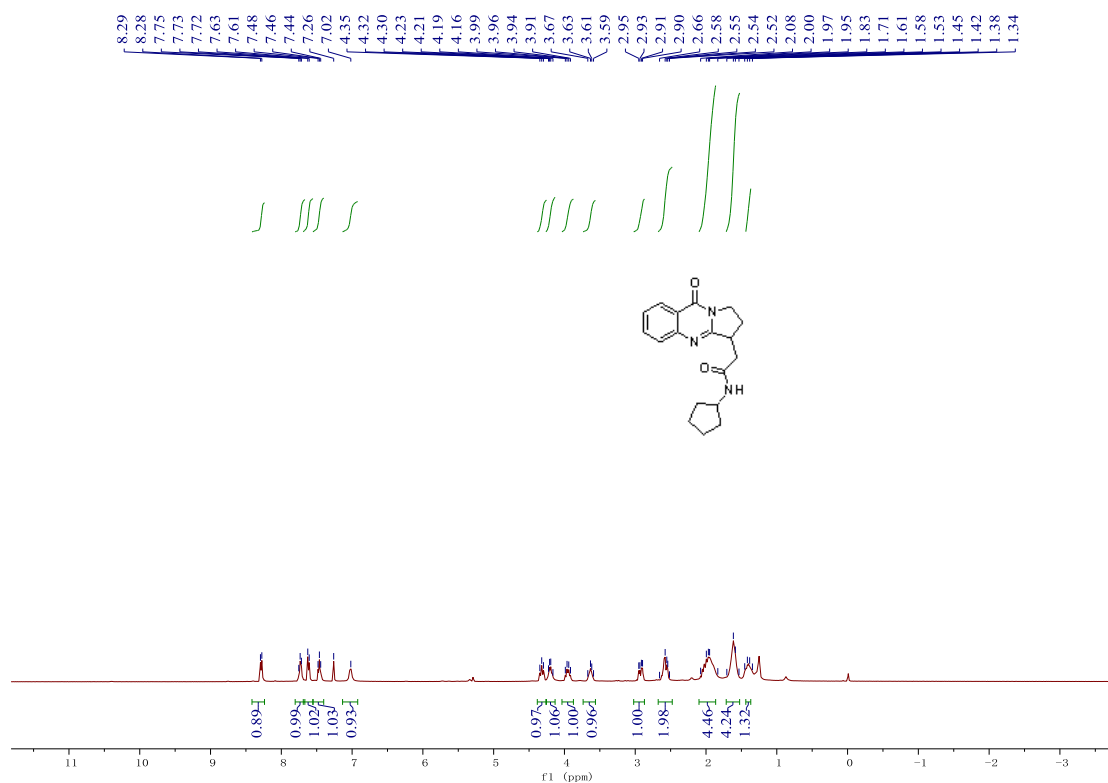

Figure S27 <sup>1</sup>H NMR spectra of 3am

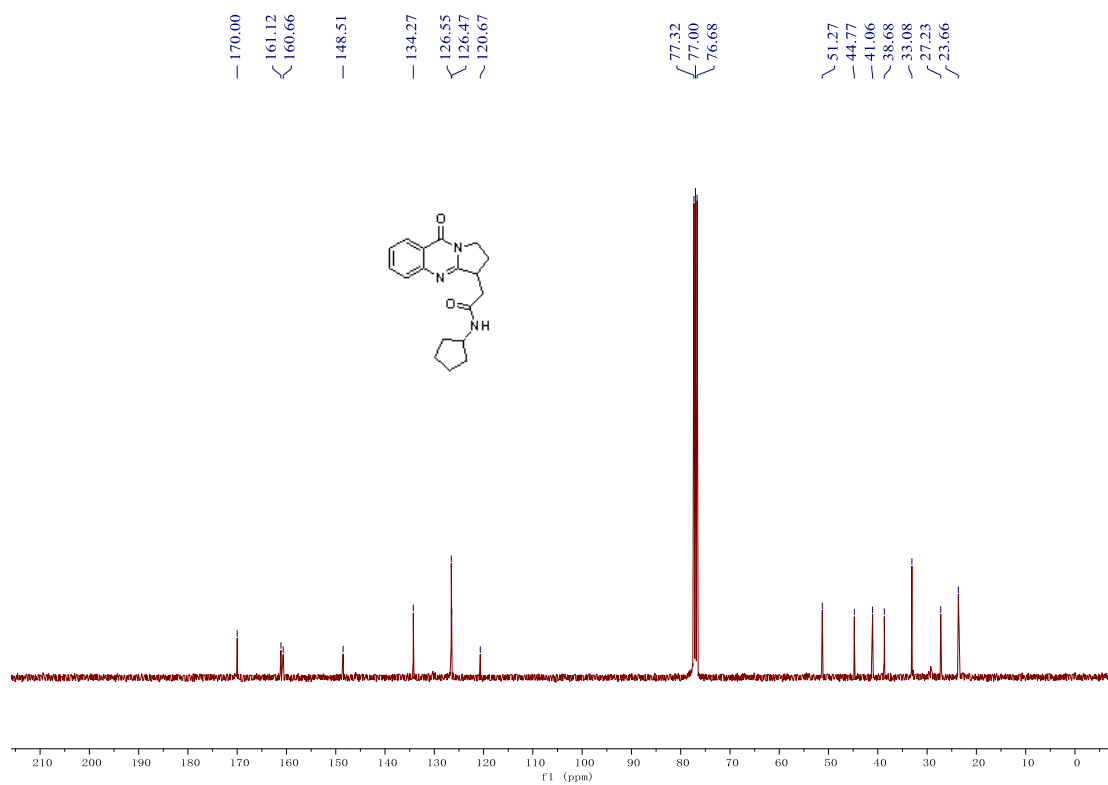

Figure S28 <sup>13</sup>C NMR spectra of 3am

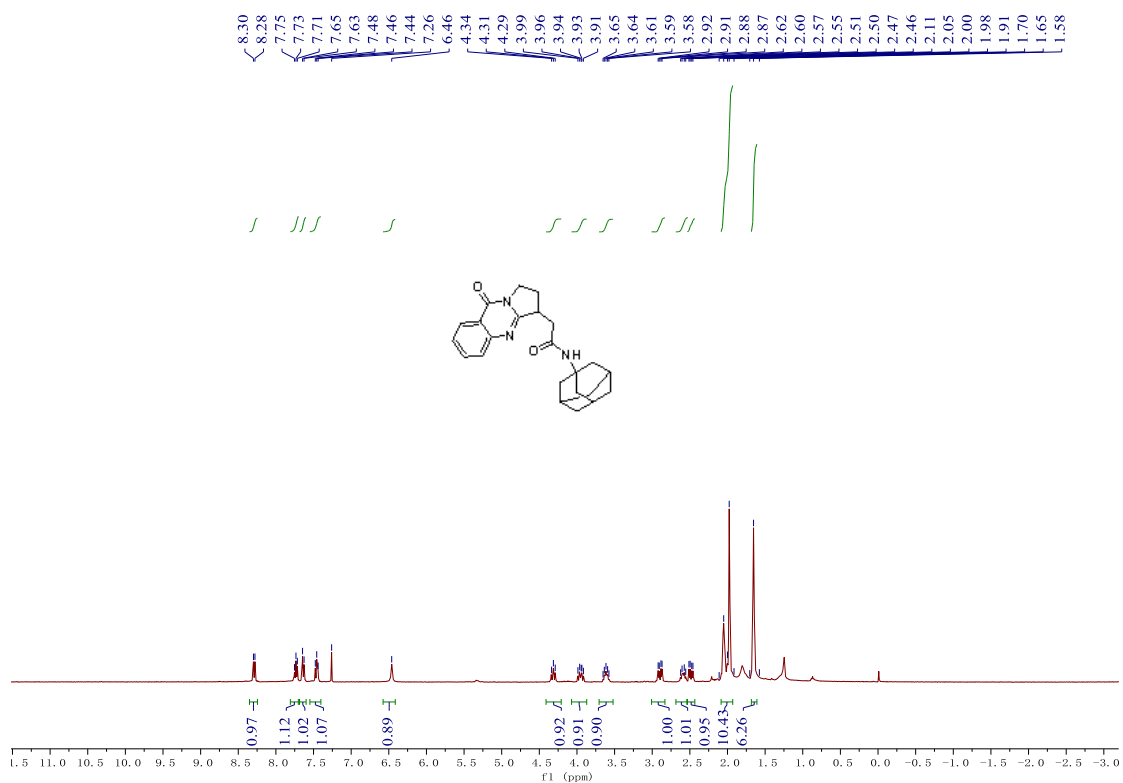

Figure S29 <sup>1</sup>H NMR spectra of 3an

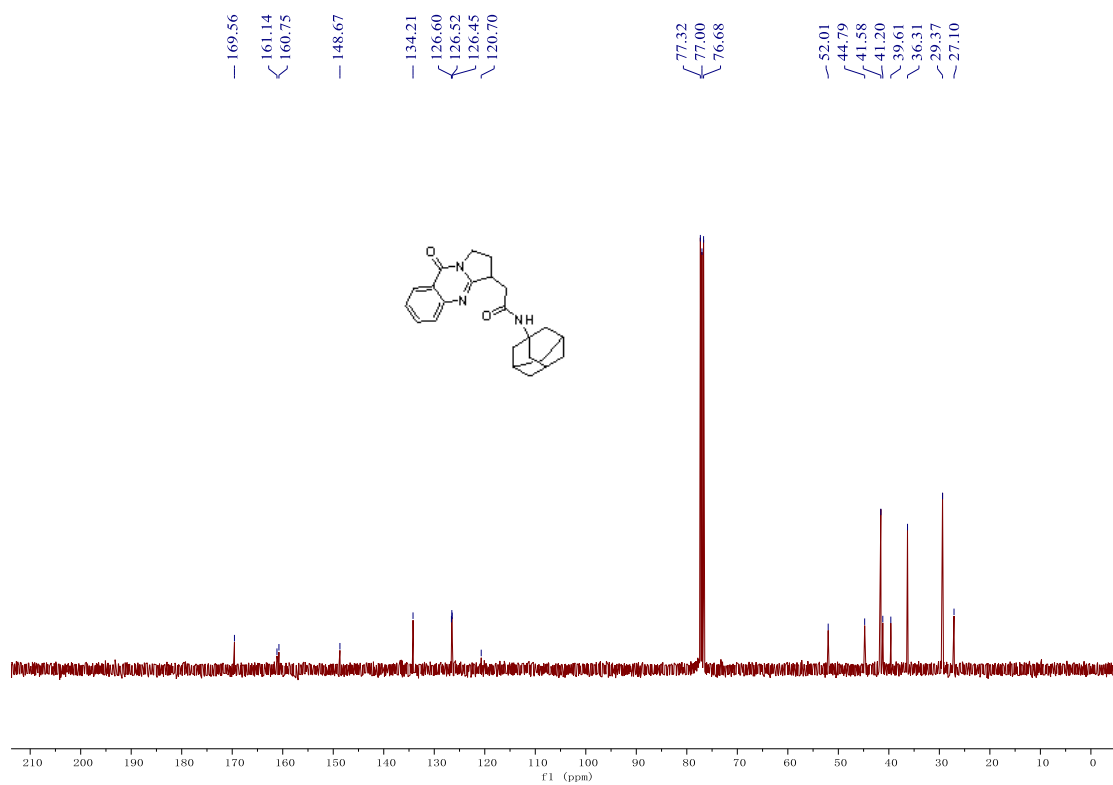

Figure S30 <sup>13</sup>C NMR spectra of 3an

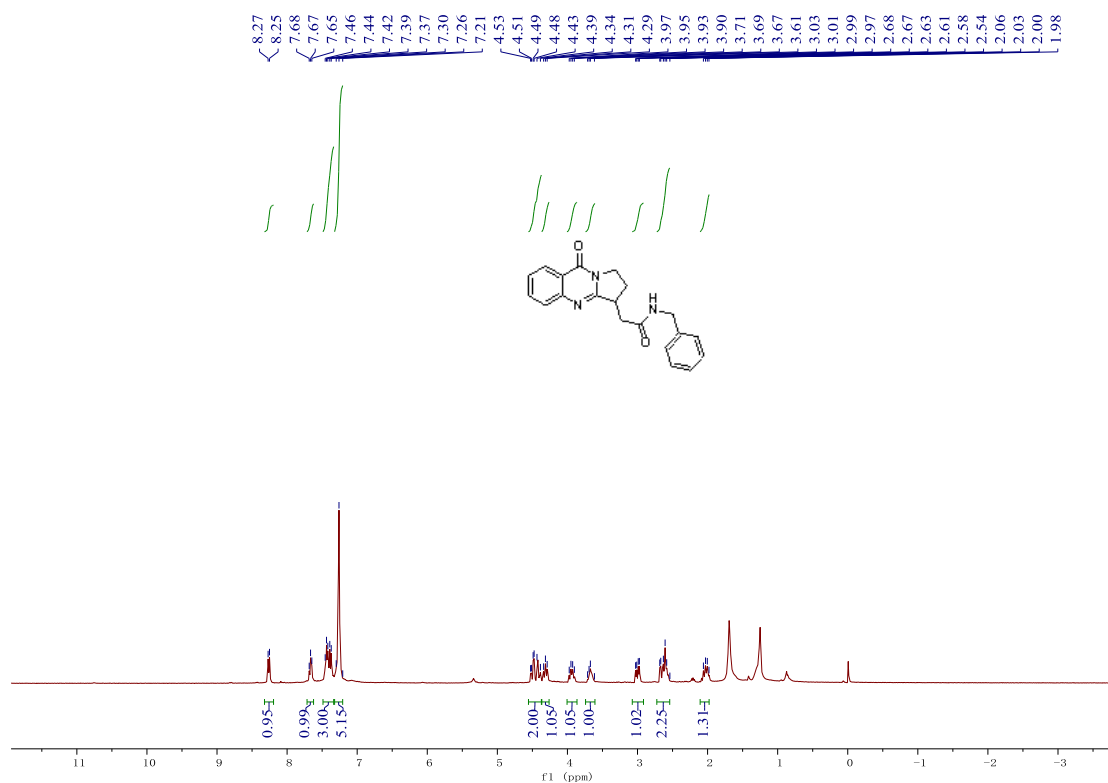

**Figure S31** <sup>1</sup>H NMR spectra of **3ao**

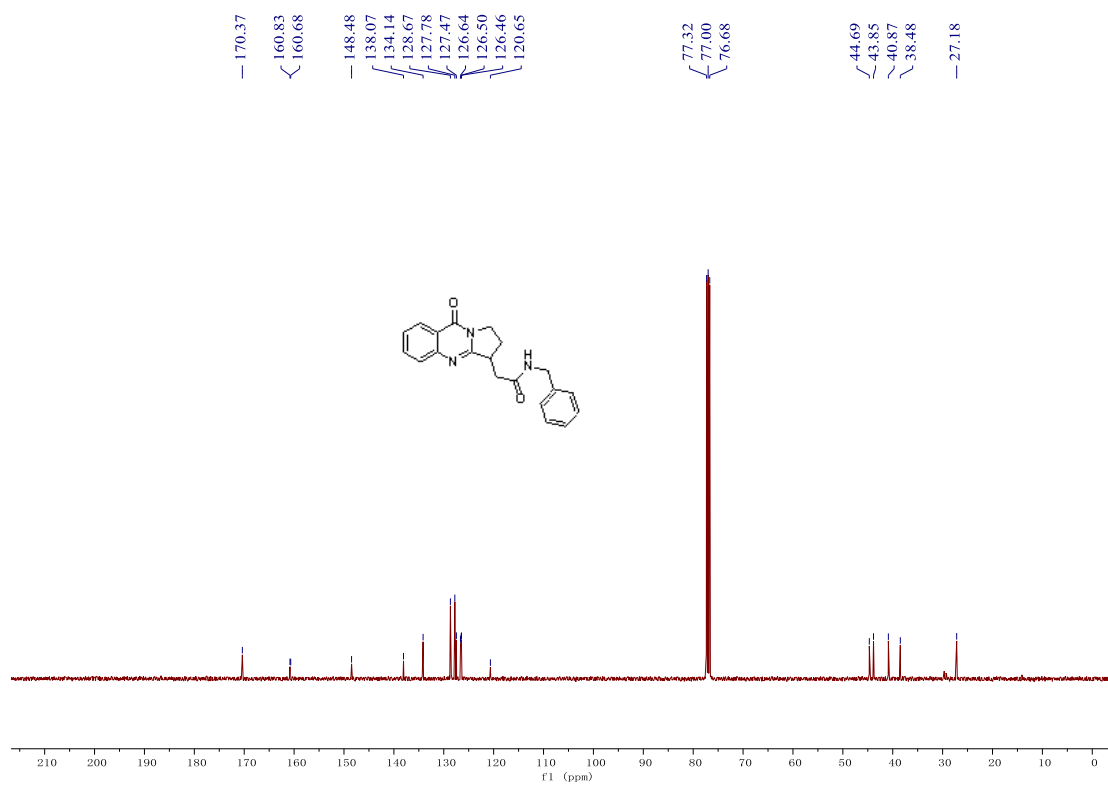

**Figure S32** <sup>13</sup>C NMR spectra of **3ao**

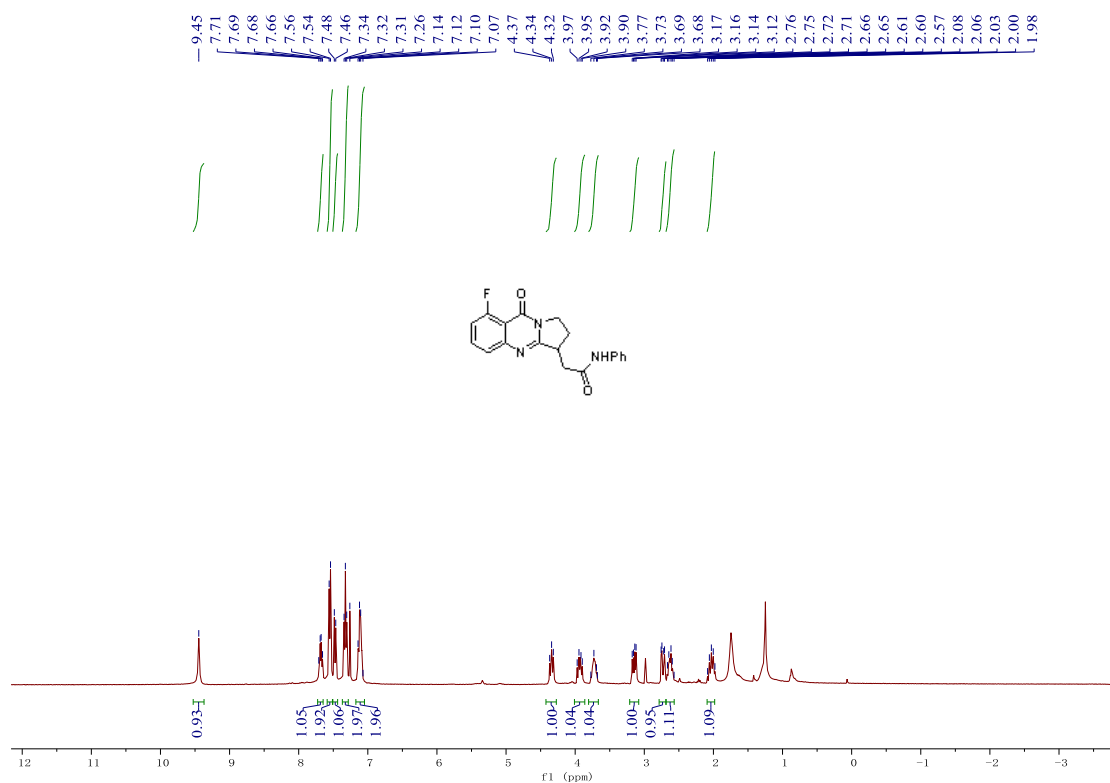

Figure S33 <sup>1</sup>H NMR spectra of 3ba

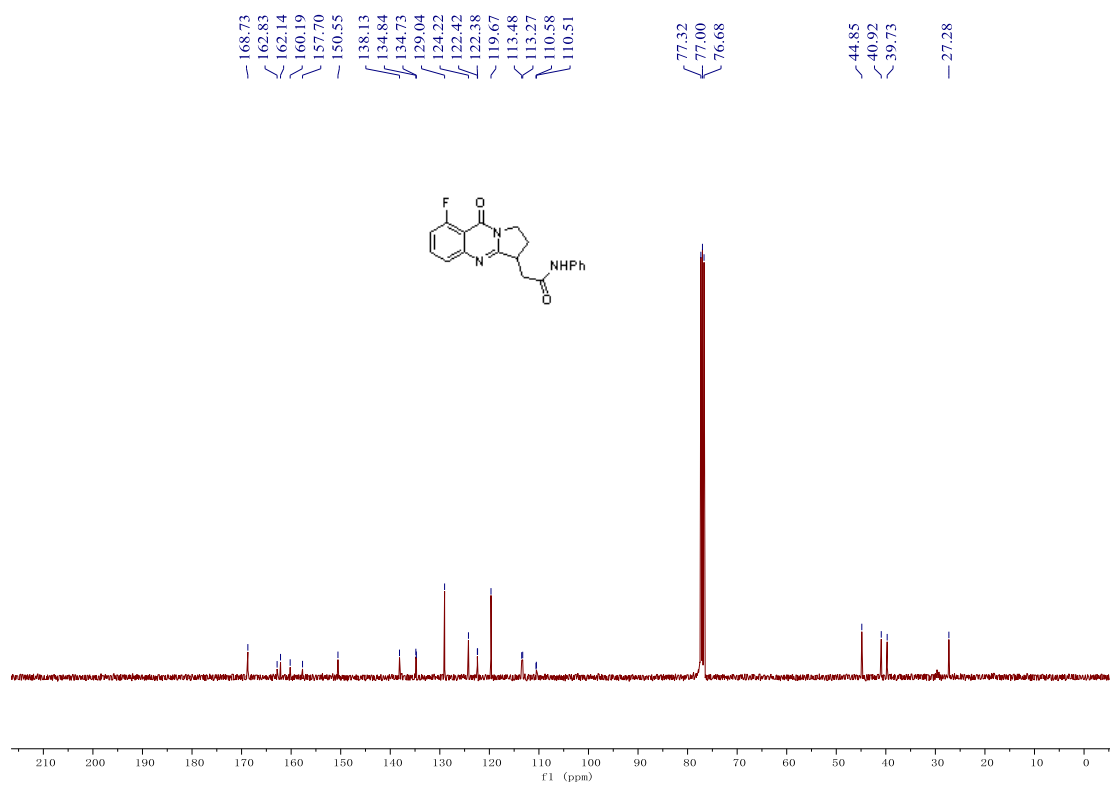

Figure S34 <sup>13</sup>C NMR spectra of 3ba

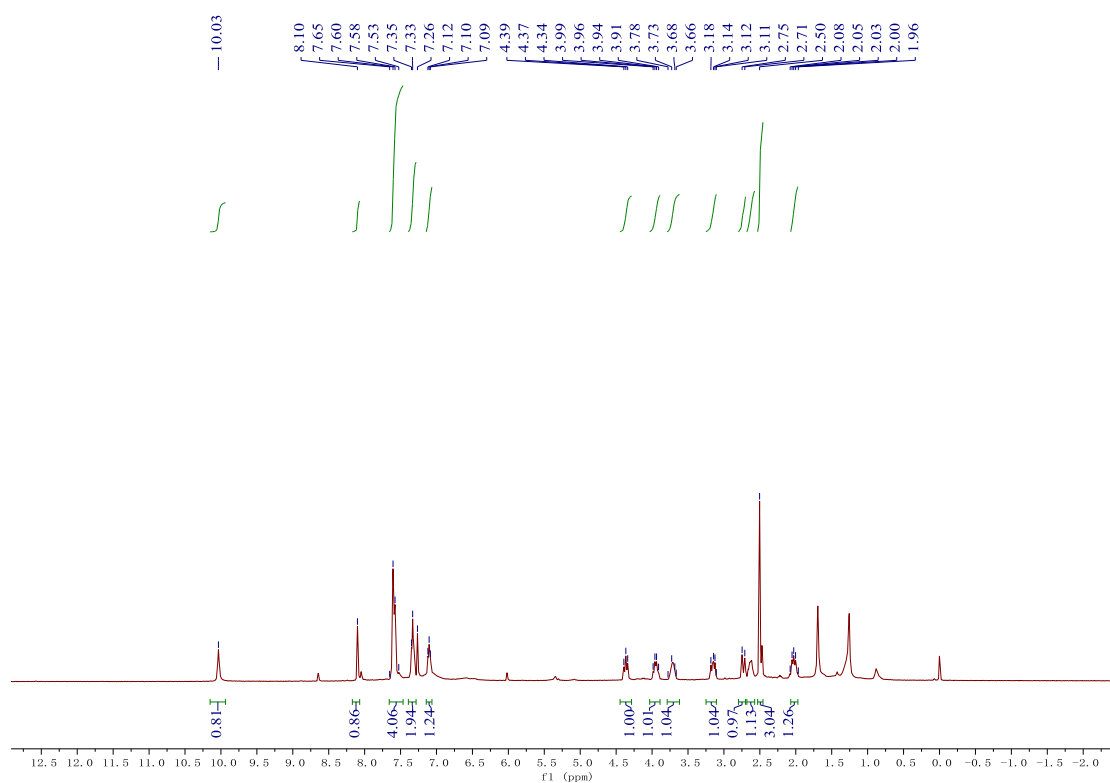

**Figure S35** <sup>1</sup>H NMR spectra of **3a**

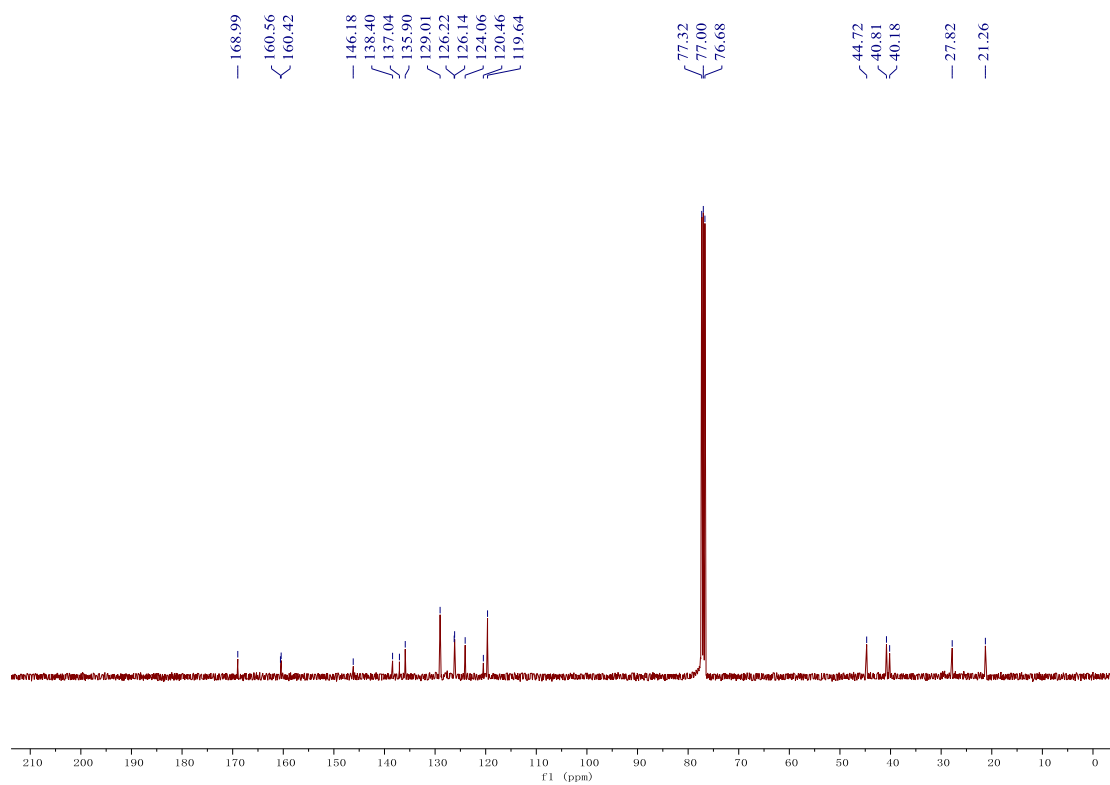

**Figure S36** <sup>13</sup>C NMR spectra of **3a**

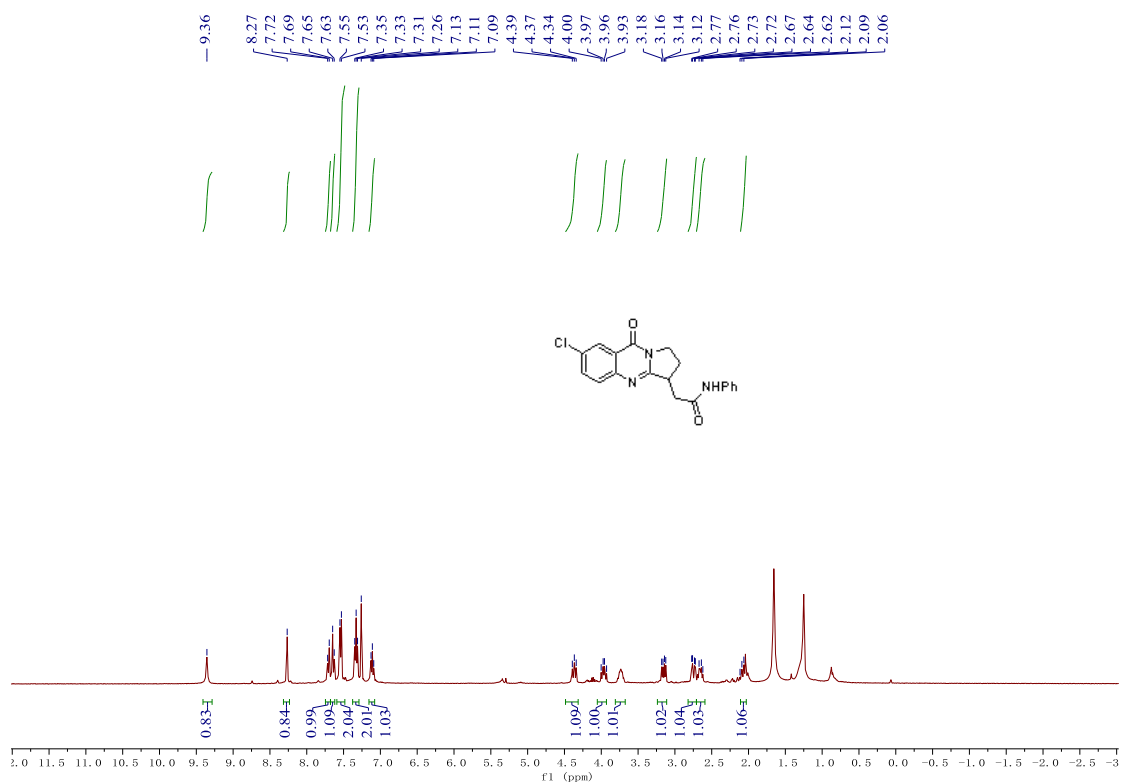

Figure S37 <sup>1</sup>H NMR spectra of 3da

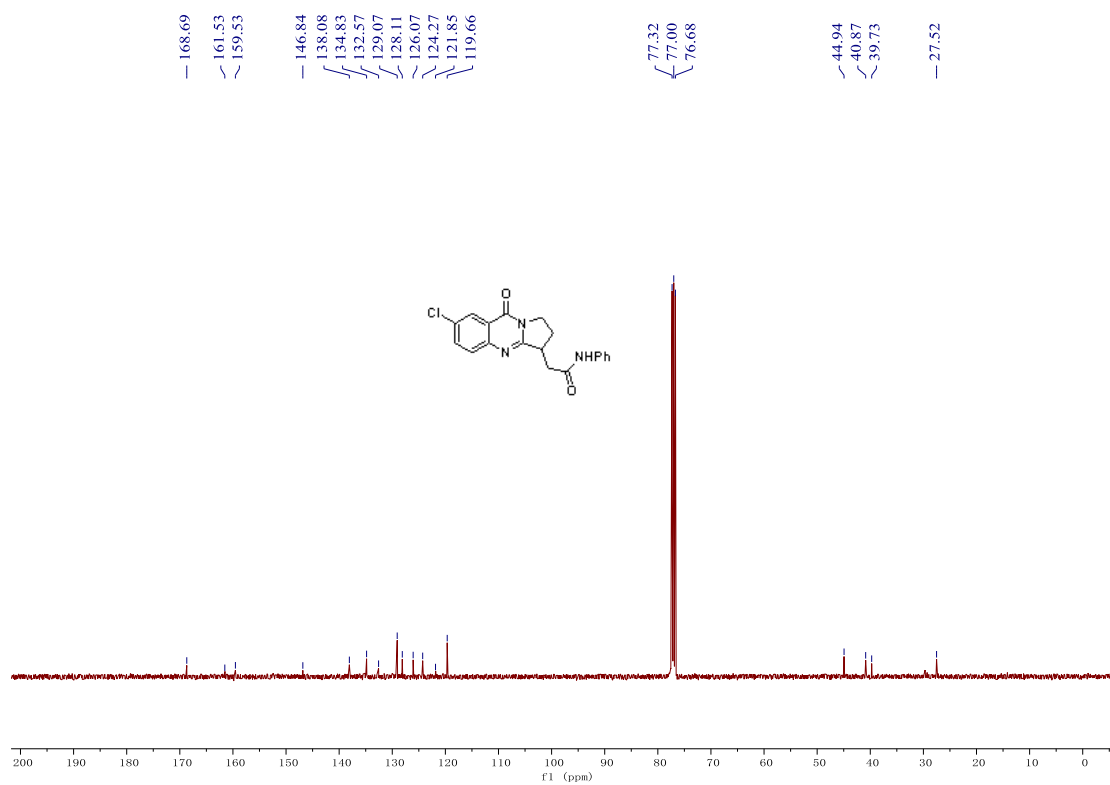

Figure S38 <sup>13</sup>C NMR spectra of 3da

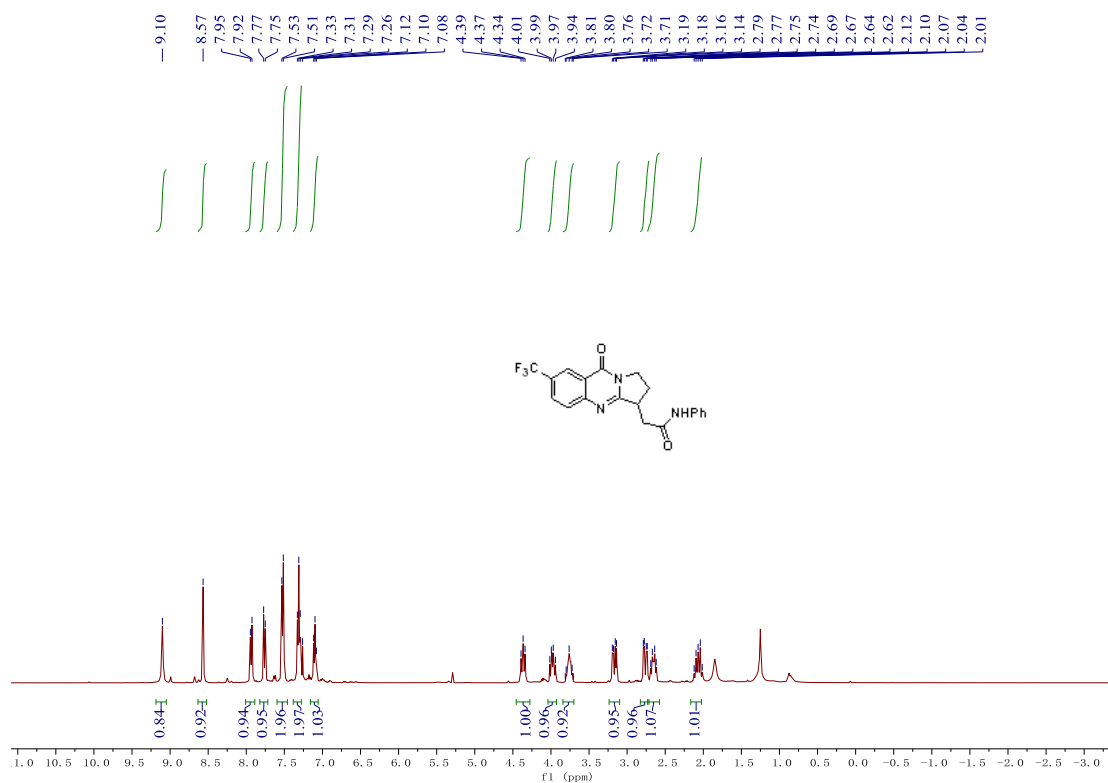

Figure S39 <sup>1</sup>H NMR spectra of 3ea

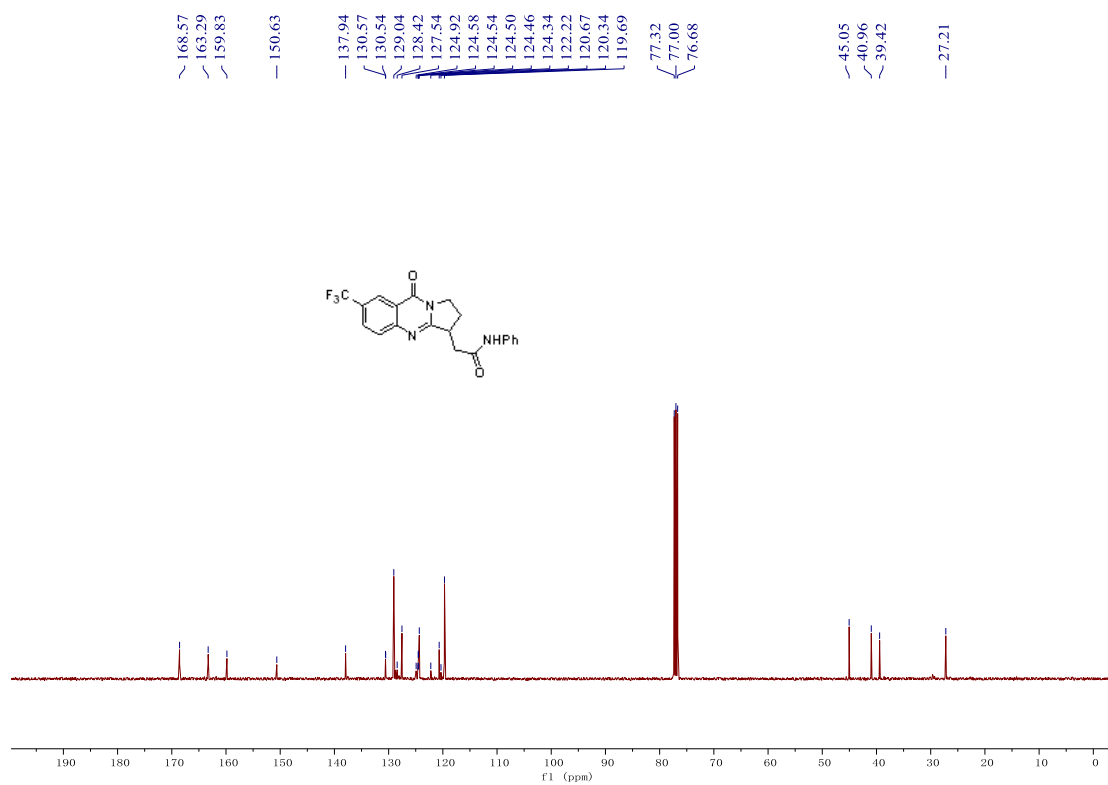

Figure S40 <sup>13</sup>C NMR spectra of 3ea

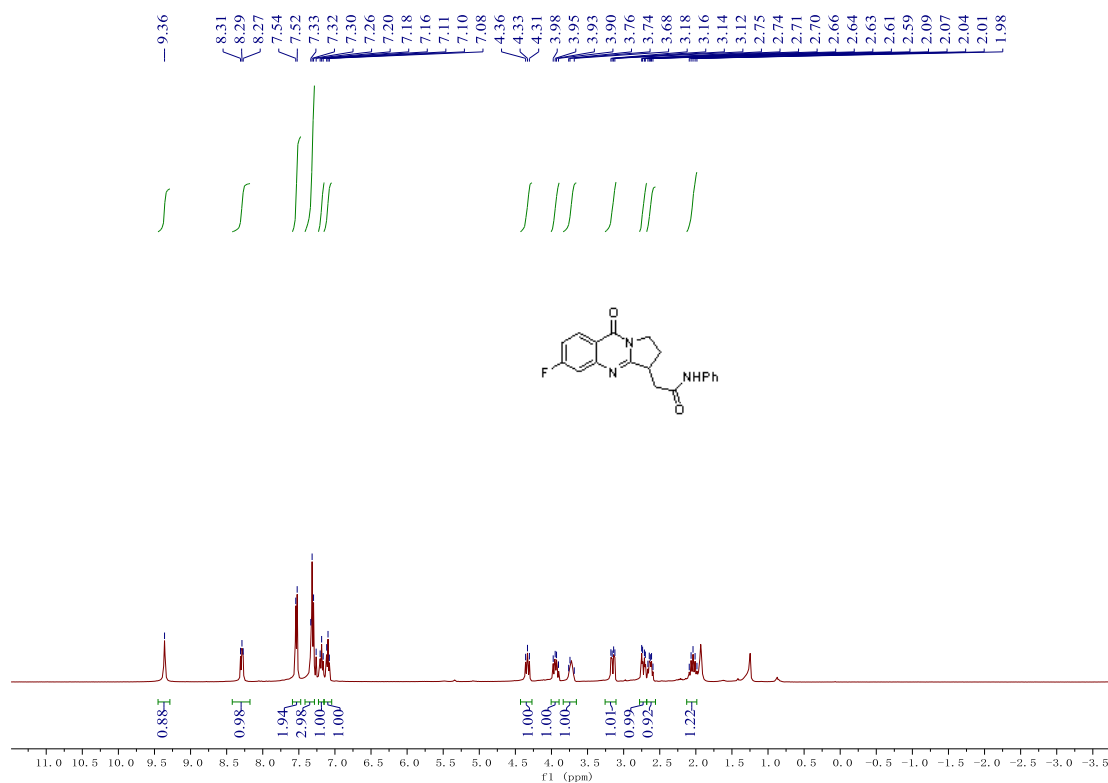

Figure S41 <sup>1</sup>H NMR spectra of 3fa

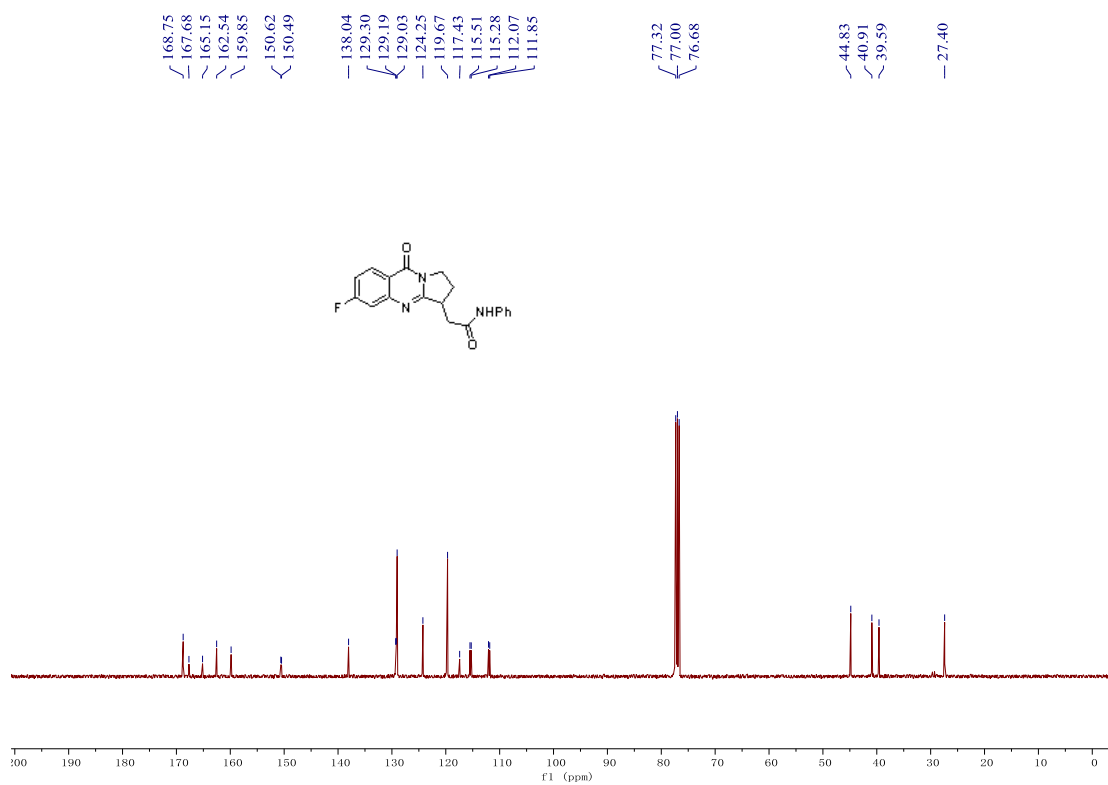

Figure S42 <sup>13</sup>C NMR spectra of 3fa

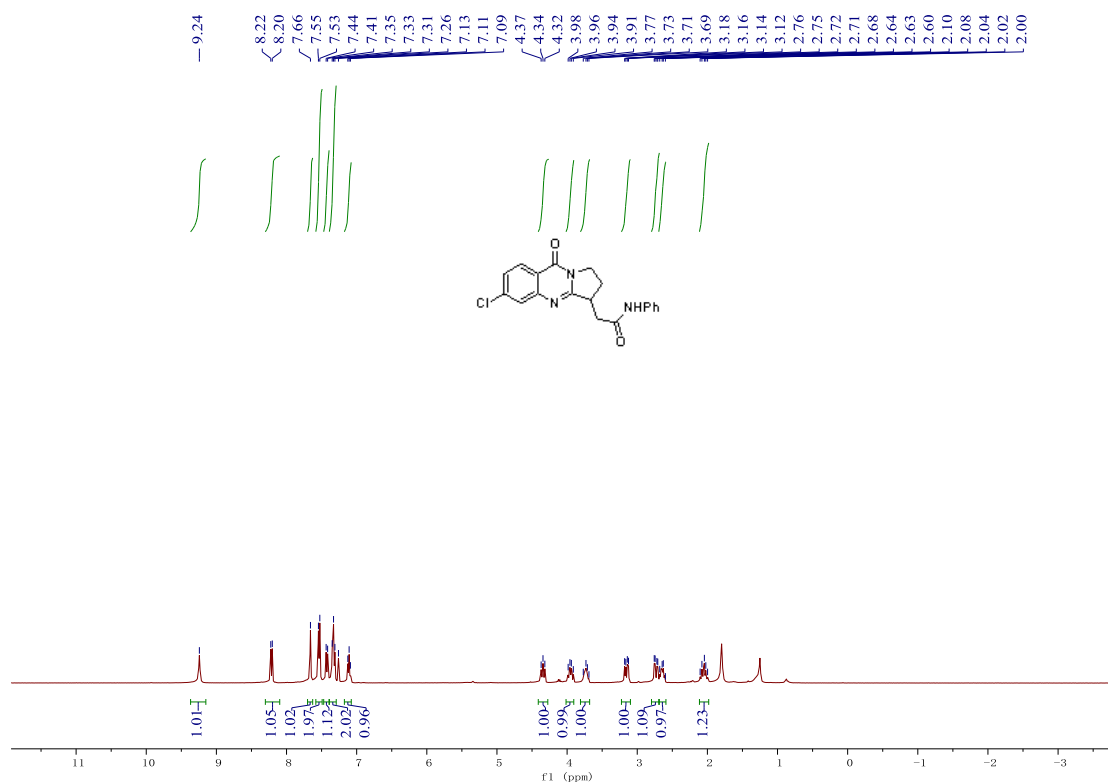

Figure S43 <sup>1</sup>H NMR spectra of **3ga**

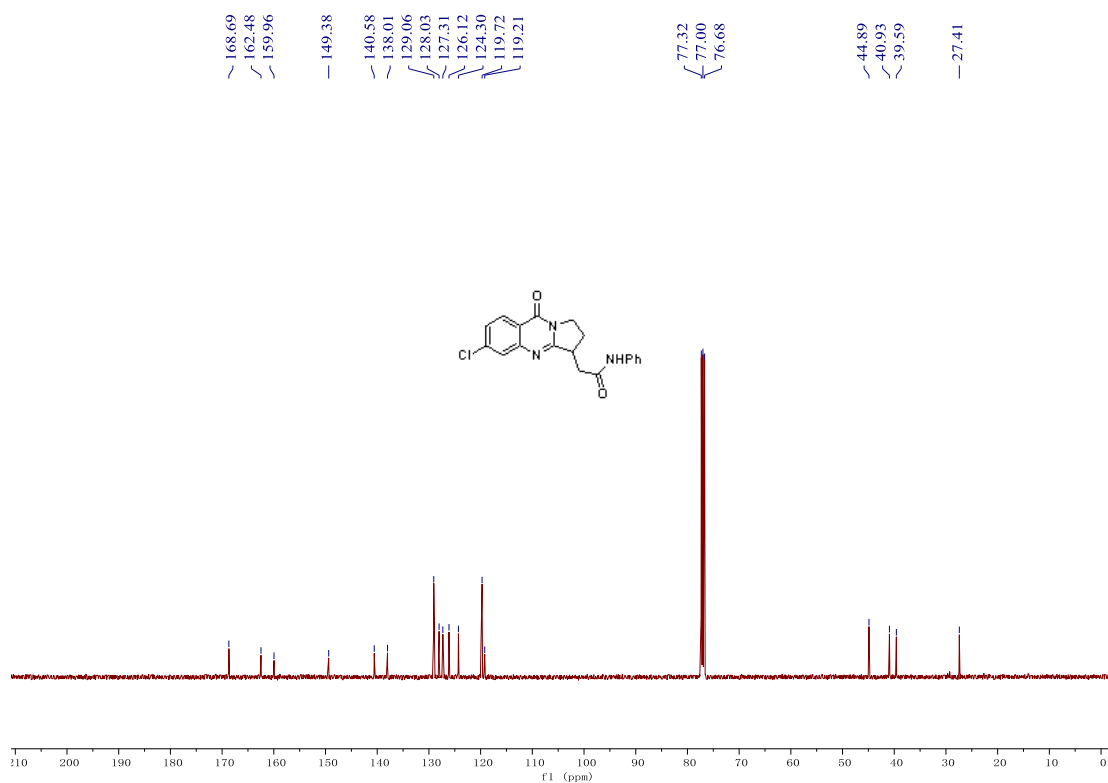

Figure S44 <sup>13</sup>C NMR spectra of **3ga**

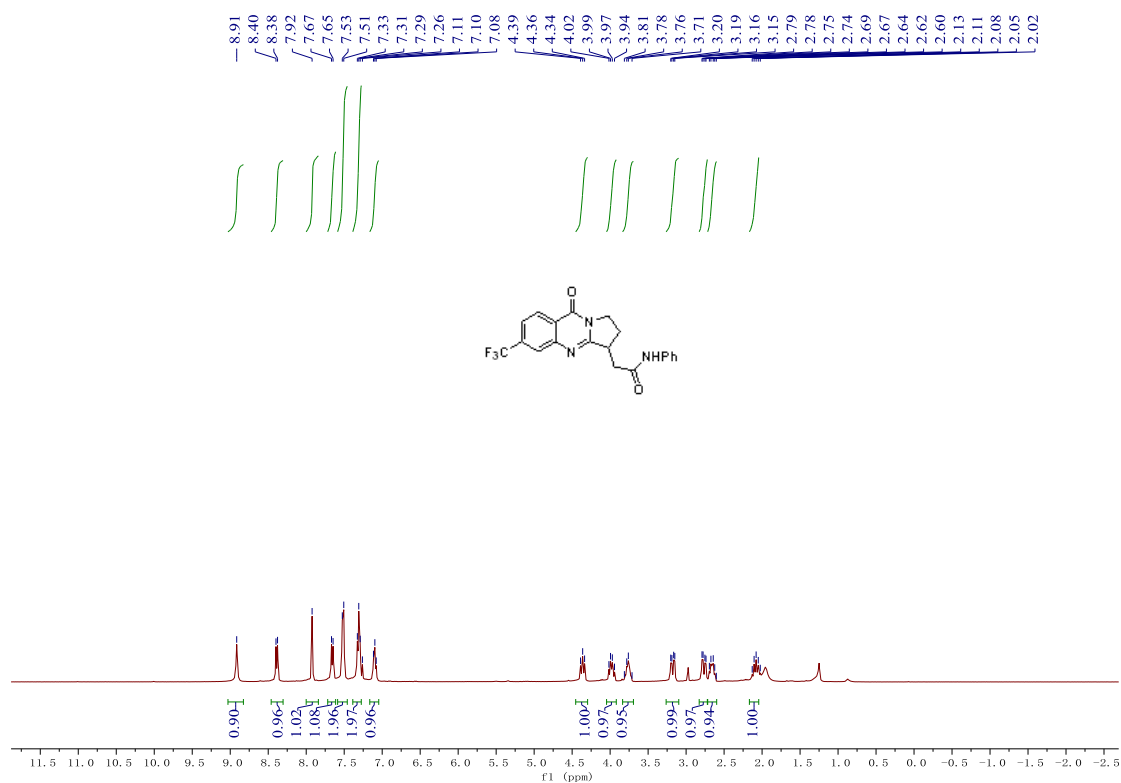

Figure S45 <sup>1</sup>H NMR spectra of 3ha

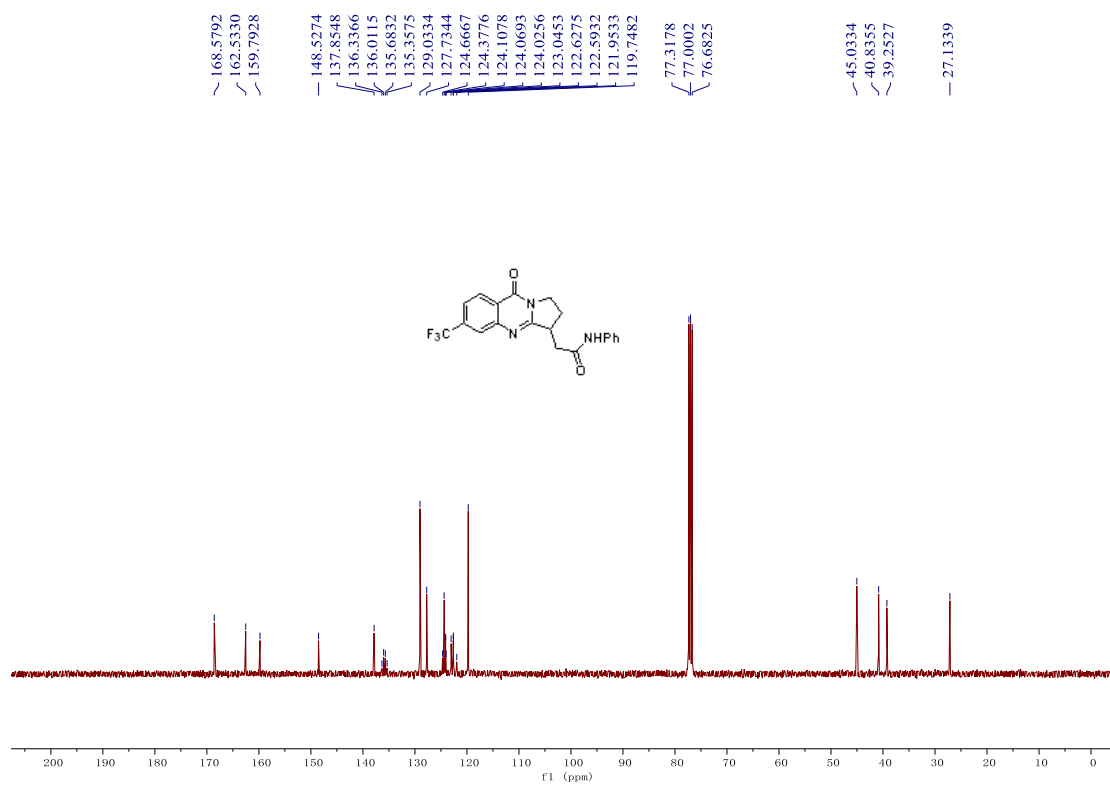

Figure S46 <sup>13</sup>C NMR spectra of 3ha

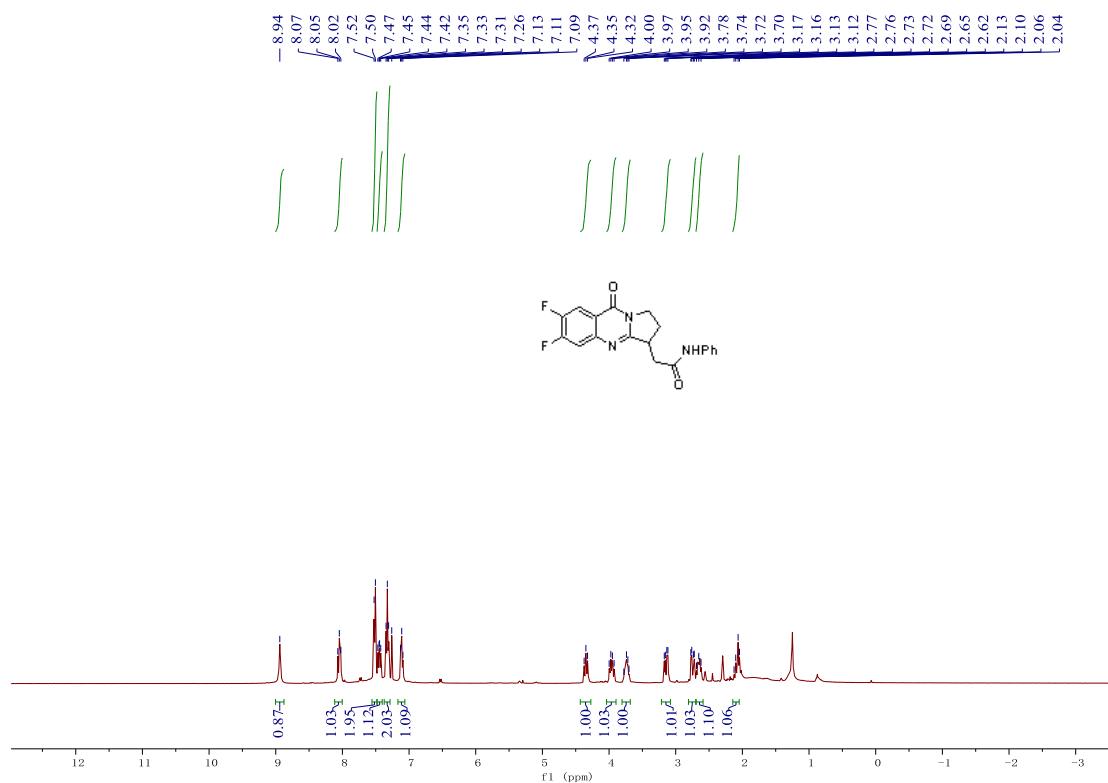

Figure S47 <sup>1</sup>H NMR spectra of **3ia**

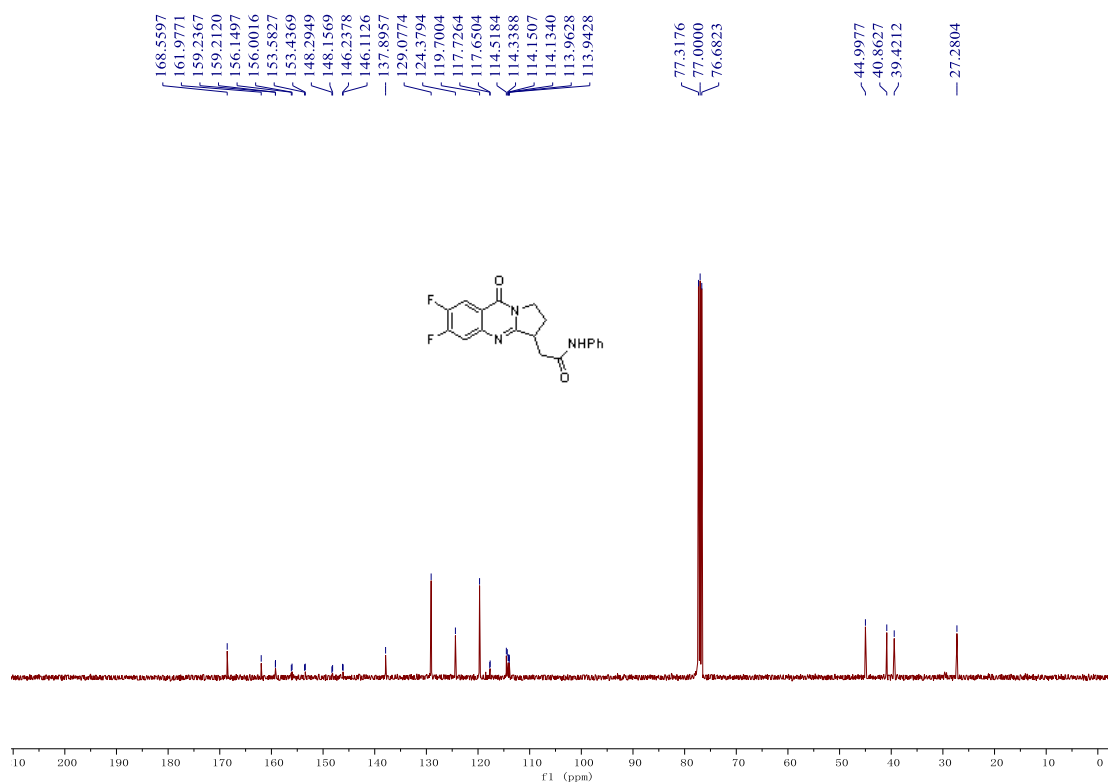

Figure S48 <sup>13</sup>C NMR spectra of **3ia**

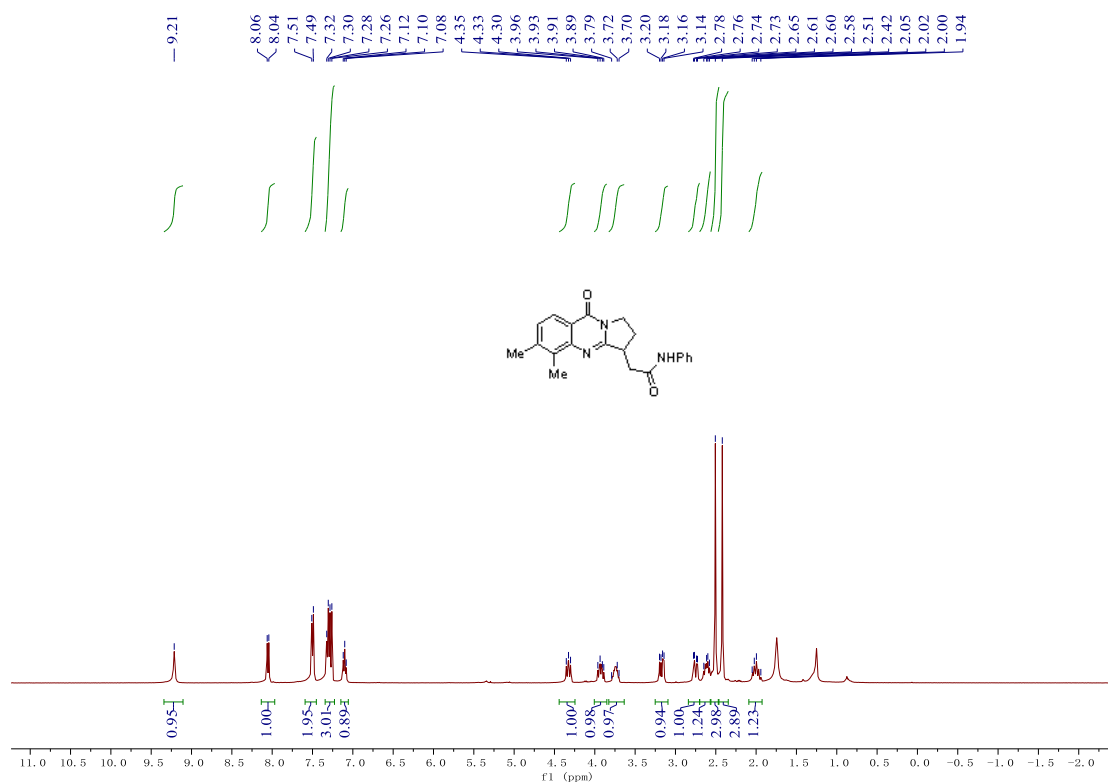

Figure S49 <sup>1</sup>H NMR spectra of 3ja

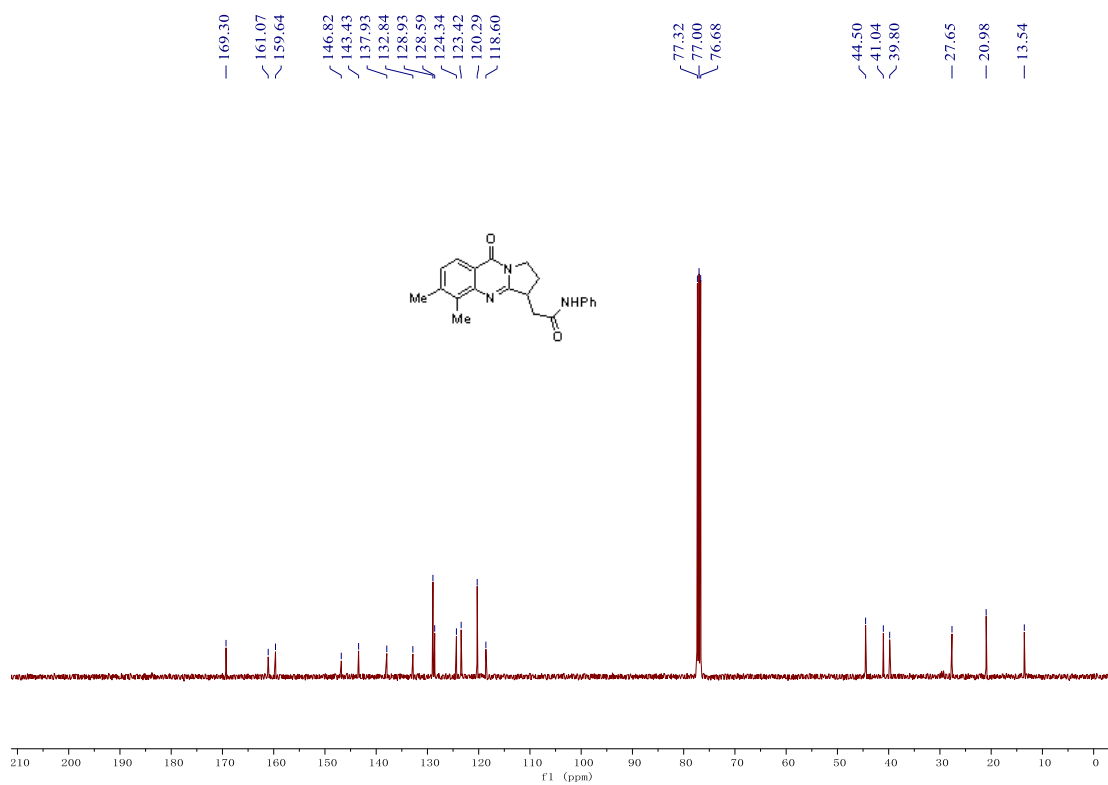

Figure S50 <sup>13</sup>C NMR spectra of 3ja

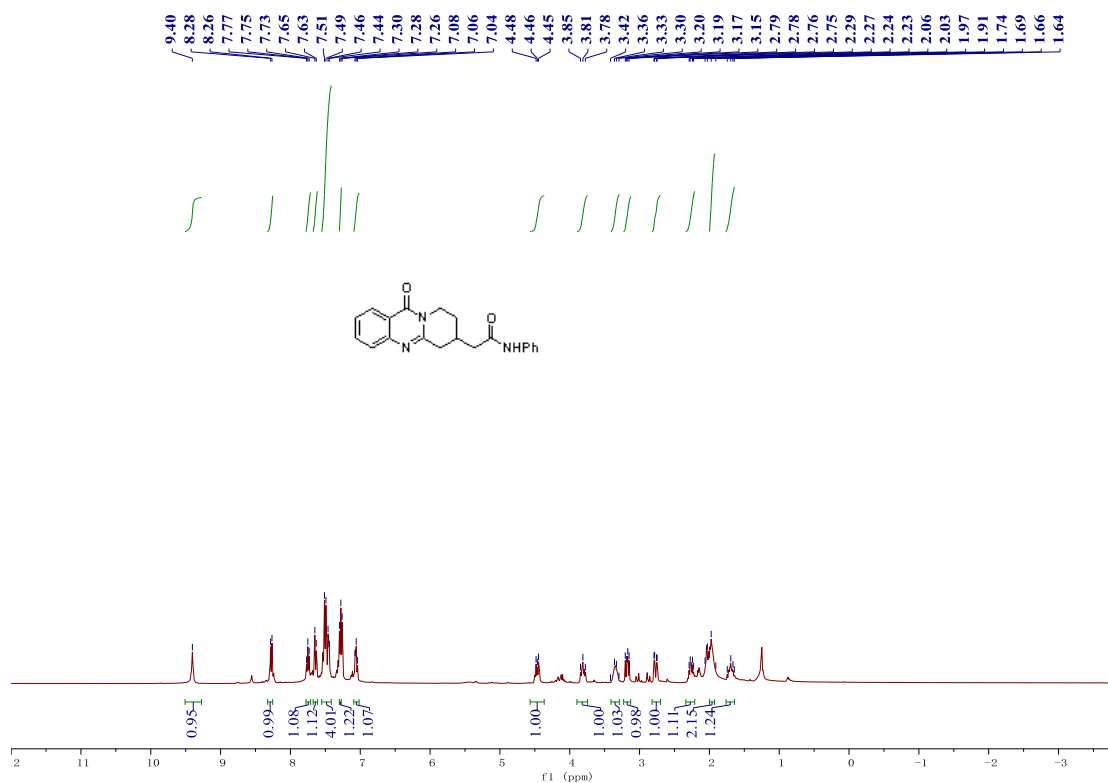

**Figure S51** <sup>1</sup>H NMR spectra of **3ka**

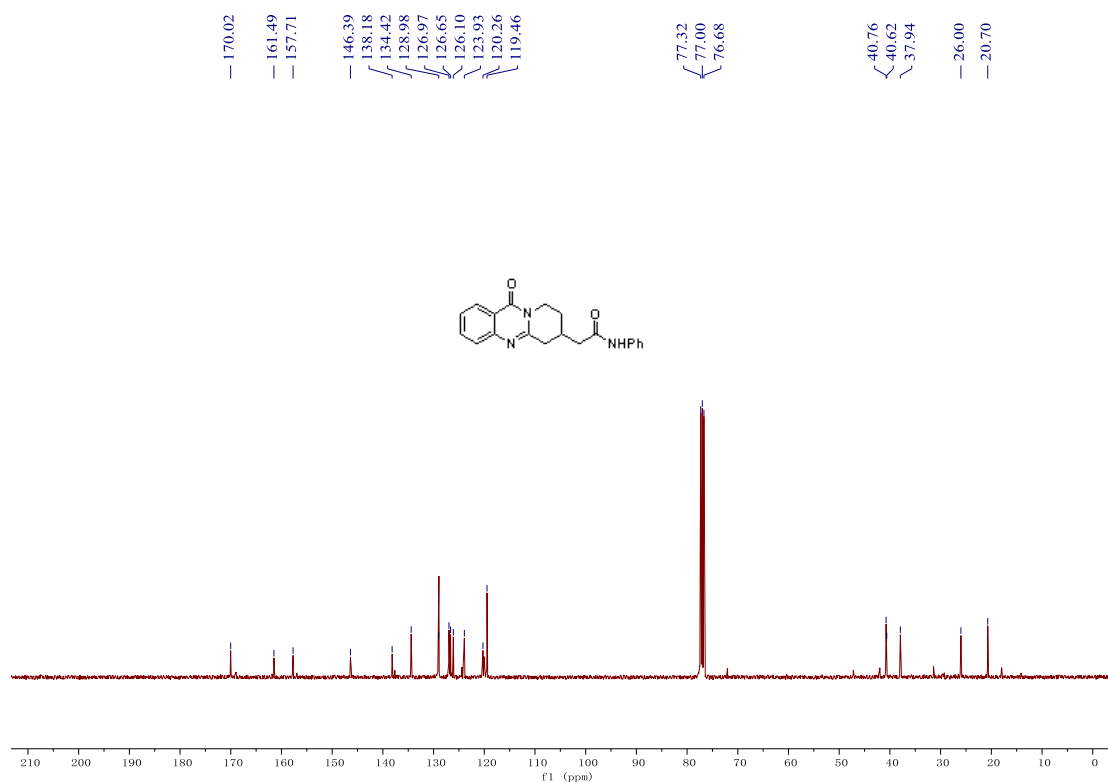

**Figure S52** <sup>13</sup>C NMR spectra of **3ka**
